# Supplementary material for: Many Models, Little Adoption—What Accounts for Low Uptake of Machine Learning Models for Atrial Fibrillation Prediction and Detection?
Source: MDPI journal article supplement (doi:10.3390/jcm13051313), 2024-02-26
Supplement: s1 [file s1]

# Many Models, Little Adoption – What Accounts for Low Uptake of Machine Learning Models for Atrial Fibrillation Prediction and Detection?

## Supplementary Information

Yuki Kawamura <sup>1,\*</sup>, Alireza Vafaei Sadr <sup>2</sup>, Vida Abedi <sup>2</sup> and Ramin Zand <sup>3,\*</sup>

<sup>1</sup> School of Clinical Medicine, University of Cambridge, Cambridge CB3 0SP, UK

<sup>2</sup> Department of Public Health Sciences, College of Medicine, The Pennsylvania State University,  
Hershey, PA 17033, USA; vabedi@pennstatehealth.psu.edu (V.A.)

<sup>3</sup> Department of Neurology, College of Medicine, The Pennsylvania State University,  
Hershey, PA 17033, USA

\* Correspondence: yk402@cam.ac.uk (Y.K.); rzand@pennstatehealth.psu.edu (R.Z.)

### Keywords

machine learning; atrial fibrillation; prevention; detection; stroke; neural networks; decision trees; paroxysmal

## Search Terms – Prediction of AF in Healthy Population

Ovid MEDLINE(R) and Epub Ahead of Print, In-Process, In-Data-Review and Other Non-Indexed Citations, Daily and Versions <1946 to September 20, 2022>

```
1      (af or atrial fibrillation or atrial flutter*).ti,ab,kw.    105677
2      atrial fibrillation/ or atrial flutter/    70394
3      predict*.ti,ab,kw.    1917375
4      (machine learning or deep learning or neural network* or ai or artificial intelligence
or decision tree or gradient boost* or XGBoost or Catboost or Bayes or SVM or support
vector machine or random forest).ti,ab,kw.    228579
5      artificial intelligence/ or machine learning/ or deep learning/ or supervised machine
learning/    71951
6      1 or 2    118611
7      4 or 5    247461
8      3 and 6 and 7
437 results
```

Embase <1974 to 2022 September 20>

```
1      (af or atrial fibrillation or atrial flutter*).ti,ab,kw.    185112
2      atrial fibrillation/ or atrial flutter/    102049
3      predict*.ti,ab,kw.    2566260
4      (machine learning or deep learning or neural network* or ai or artificial intelligence
or decision tree or gradient boost* or XGBoost or Catboost or Bayes or SVM or support
vector machine or random forest).ti,ab,kw.    279848
5      artificial intelligence/ or machine learning/ or deep learning/ or supervised machine
learning/    130437
6      1 or 2    212881
7      4 or 5    307847
8      3 and 6 and 7
886 results
```

Web of Science

af or atrial fibrillation or atrial flutter\* (Topic) and predict\* (Topic) and machine learning or deep learning or neural network\* or ai or artificial intelligence or decision tree or gradient boost\* or XGBoost or Catboost or Bayes or SVM or support vector machine or random forest (Topic) 798 results

WHO ICTRP

("Atrial Fibrillation" OR "Atrial flutter") AND (predict or prediction) 44 results

Clinicaltrials.gov

("Atrial Fibrillation" OR "Atrial flutter") AND (predict or prediction) 69 results

## Search Terms – Detection of AF in Stroke Population

### Ovid MEDLINE(R) and Epub Ahead of Print, In-Process, In-Data-Review and Other Non-Indexed Citations, Daily and Versions <1946 to September 20, 2022>

- 1 (af or atrial fibrillation or atrial flutter\*).ti,ab,kw. 105677
  - 2 atrial fibrillation/ or atrial flutter/ 70394
  - 3 detect\*.ti,ab,kw. 2667685
  - 4 (stroke or cerebral infarction or cerebrovascular accident or isch\* stroke or cerebrovascular accident or brain isch\* or isch\* attack or cerebral isch\* or thromboemb\* or apoplex\*).ti,ab,kw. 396482
  - 5 Stroke/ or Embolic Stroke/ or Ischemic Stroke/ or Thrombotic Stroke/ or Stroke, Lacunar/ 128922
  - 6 exp Stroke/ 163665
  - 7 (machine learning or deep learning or neural network\* or ai or artificial intelligence or decision tree or gradient boost\* or XGBoost or Catboost or Bayes or SVM or support vector machine or random forest).ti,ab,kw. 228579
  - 8 artificial intelligence/ or machine learning/ or deep learning/ or supervised machine learning/ 71951
  - 9 1 or 2 118611
  - 10 4 or 5 or 6 426807
  - 11 7 or 8 247461
  - 12 3 and 9 and 10 and 11
- 102 results

### Embase <1974 to 2022 September 20>

- 1 (af or atrial fibrillation or atrial flutter\*).ti,ab,kw. 185112
  - 2 atrial fibrillation/ or atrial flutter/ 102049
  - 3 detect\*.ti,ab,kw. 3391606
  - 4 (stroke or cerebral infarction or cerebrovascular accident or isch\* stroke or cerebrovascular accident or brain isch\* or isch\* attack or cerebral isch\* or thromboemb\* or apoplex\*).ti,ab,kw. 618454
  - 5 exp Stroke/ 277025
  - 6 cerebrovascular accident/ or cardioembolic stroke/ or ischemic stroke/ or lacunar stroke/ 272014
  - 7 (machine learning or deep learning or neural network\* or ai or artificial intelligence or decision tree or gradient boost\* or XGBoost or Catboost or Bayes or SVM or support vector machine or random forest).ti,ab,kw. 279848
  - 8 artificial intelligence/ or machine learning/ or deep learning/ or supervised machine learning/ 130437
  - 9 1 or 2 212881
  - 10 4 or 5 or 6 686227
  - 11 7 or 8 307847
  - 12 3 and 9 and 10 and 11
- 166 results

#### Web of Science

((TS=(af or atrial fibrillation or atrial flutter\*)) AND TS=(detect\*)) AND TS=(stroke or cerebral infarction or cerebrovascular accident or isch\* stroke or cerebrovascular accident or brain isch\* or isch\* attack or cerebral isch\* or thromboemb\* or apoplex\*)) AND TS=(machine learning or deep learning or neural network\* or ai or artificial intelligence or decision tree or gradient boost\* or XGBoost or Catboost or Bayes or SVM or support vector machine or random forest) 215 results

#### WHO ICTRP

("Atrial Fibrillation" OR "Atrial flutter") AND (detect OR detection) AND (stroke OR "cerebral ischemia" OR "cerebral ischemia" OR "cerebral infarction" OR "brain ischemia" OR stroke OR "cerebrovascular accident") 45 results

#### Clinicaltrials.gov

("Atrial Fibrillation" OR "Atrial flutter") AND (detect OR detection) AND (stroke OR "cerebral ischemia" OR "cerebral ischemia" OR "cerebral infarction" OR "brain ischemia" OR stroke OR "cerebrovascular accident") 53 results

**Table S1. PRISMA checklist.**

**Preferred Reporting Items for Systematic reviews and Meta-Analyses extension for Scoping Reviews (PRISMA-ScR) Checklist**

| SECTION                                               | ITEM | PRISMA-ScR CHECKLIST ITEM                                                                                                                                                                                                                                                                                  | REPORTED ON PAGE #  |
|-------------------------------------------------------|------|------------------------------------------------------------------------------------------------------------------------------------------------------------------------------------------------------------------------------------------------------------------------------------------------------------|---------------------|
| <b>TITLE</b>                                          |      |                                                                                                                                                                                                                                                                                                            |                     |
| Title                                                 | 1    | Identify the report as a scoping review.                                                                                                                                                                                                                                                                   | P1                  |
| <b>ABSTRACT</b>                                       |      |                                                                                                                                                                                                                                                                                                            |                     |
| Structured summary                                    | 2    | Provide a structured summary that includes (as applicable): background, objectives, eligibility criteria, sources of evidence, charting methods, results, and conclusions that relate to the review questions and objectives.                                                                              | P1                  |
| <b>INTRODUCTION</b>                                   |      |                                                                                                                                                                                                                                                                                                            |                     |
| Rationale                                             | 3    | Describe the rationale for the review in the context of what is already known. Explain why the review questions/objectives lend themselves to a scoping review approach.                                                                                                                                   | P1-P2               |
| Objectives                                            | 4    | Provide an explicit statement of the questions and objectives being addressed with reference to their key elements (e.g., population or participants, concepts, and context) or other relevant key elements used to conceptualize the review questions and/or objectives.                                  | P2-3                |
| <b>METHODS</b>                                        |      |                                                                                                                                                                                                                                                                                                            |                     |
| Protocol and registration                             | 5    | Indicate whether a review protocol exists; state if and where it can be accessed (e.g., a Web address); and if available, provide registration information, including the registration number.                                                                                                             | N/A                 |
| Eligibility criteria                                  | 6    | Specify characteristics of the sources of evidence used as eligibility criteria (e.g., years considered, language, and publication status), and provide a rationale.                                                                                                                                       | P3                  |
| Information sources*                                  | 7    | Describe all information sources in the search (e.g., databases with dates of coverage and contact with authors to identify additional sources), as well as the date the most recent search was executed.                                                                                                  | P3                  |
| Search                                                | 8    | Present the full electronic search strategy for at least 1 database, including any limits used, such that it could be repeated.                                                                                                                                                                            | P3, Supplement P2-4 |
| Selection of sources of evidence†                     | 9    | State the process for selecting sources of evidence (i.e., screening and eligibility) included in the scoping review.                                                                                                                                                                                      | P2,3                |
| Data charting process‡                                | 10   | Describe the methods of charting data from the included sources of evidence (e.g., calibrated forms or forms that have been tested by the team before their use, and whether data charting was done independently or in duplicate) and any processes for obtaining and confirming data from investigators. | P3,4                |
| Data items                                            | 11   | List and define all variables for which data were sought and any assumptions and simplifications made.                                                                                                                                                                                                     | P4                  |
| Critical appraisal of individual sources of evidence§ | 12   | If done, provide a rationale for conducting a critical appraisal of included sources of evidence; describe the methods used and how this information was used in any data synthesis (if appropriate).                                                                                                      | N/A                 |
| Synthesis of results                                  | 13   | Describe the methods of handling and summarizing the data that were charted.                                                                                                                                                                                                                               | N/A                 |
| <b>RESULTS</b>                                        |      |                                                                                                                                                                                                                                                                                                            |                     |

| SECTION                                       | ITEM | PRISMA-ScR CHECKLIST ITEM                                                                                                                                                                       | REPORTED ON PAGE #      |
|-----------------------------------------------|------|-------------------------------------------------------------------------------------------------------------------------------------------------------------------------------------------------|-------------------------|
| Selection of sources of evidence              | 14   | Give numbers of sources of evidence screened, assessed for eligibility, and included in the review, with reasons for exclusions at each stage, ideally using a flow diagram.                    | P4, P8<br>Figure S1, S2 |
| Characteristics of sources of evidence        | 15   | For each source of evidence, present characteristics for which data were charted and provide the citations.                                                                                     | P4, P8, Table S3, S7    |
| Critical appraisal within sources of evidence | 16   | If done, present data on critical appraisal of included sources of evidence (see item 12).                                                                                                      | N/A                     |
| Results of individual sources of evidence     | 17   | For each included source of evidence, present the relevant data that were charted that relate to the review questions and objectives.                                                           | P4-P9                   |
| Synthesis of results                          | 18   | Summarize and/or present the charting results as they relate to the review questions and objectives.                                                                                            | P4-P9                   |
| <b>DISCUSSION</b>                             |      |                                                                                                                                                                                                 |                         |
| Summary of evidence                           | 19   | Summarize the main results (including an overview of concepts, themes, and types of evidence available), link to the review questions and objectives, and consider the relevance to key groups. | P9-11                   |
| Limitations                                   | 20   | Discuss the limitations of the scoping review process.                                                                                                                                          | P11                     |
| Conclusions                                   | 21   | Provide a general interpretation of the results with respect to the review questions and objectives, as well as potential implications and/or next steps.                                       | P11-12                  |
| <b>FUNDING</b>                                |      |                                                                                                                                                                                                 |                         |
| Funding                                       | 22   | Describe sources of funding for the included sources of evidence, as well as sources of funding for the scoping review. Describe the role of the funders of the scoping review.                 | P12                     |

JB1 = Joanna Briggs Institute; PRISMA-ScR = Preferred Reporting Items for Systematic reviews and Meta-Analyses extension for Scoping Reviews.

\* Where *sources of evidence* (see second footnote) are compiled from, such as bibliographic databases, social media platforms, and Web sites.

† A more inclusive/heterogeneous term used to account for the different types of evidence or data sources (e.g., quantitative and/or qualitative research, expert opinion, and policy documents) that may be eligible in a scoping review as opposed to only studies. This is not to be confused with *information sources* (see first footnote).

‡ The frameworks by Arksey and O'Malley (6) and Levac and colleagues (7) and the JB1 guidance (4, 5) refer to the process of data extraction in a scoping review as data charting.

§ The process of systematically examining research evidence to assess its validity, results, and relevance before using it to inform a decision. This term is used for items 12 and 19 instead of "risk of bias" (which is more applicable to systematic reviews of interventions) to include and acknowledge the various sources of evidence that may be used in a scoping review (e.g., quantitative and/or qualitative research, expert opinion, and policy document).

From: Tricco AC, Lillie E, Zarin W, O'Brien KK, Colquhoun H, Levac D et al. PRISMA Extension for Scoping Reviews (PRISMA-ScR): Checklist and Explanation. *Ann Intern Med*. 2018;169:467–473. doi: 10.7326/M18-0850.

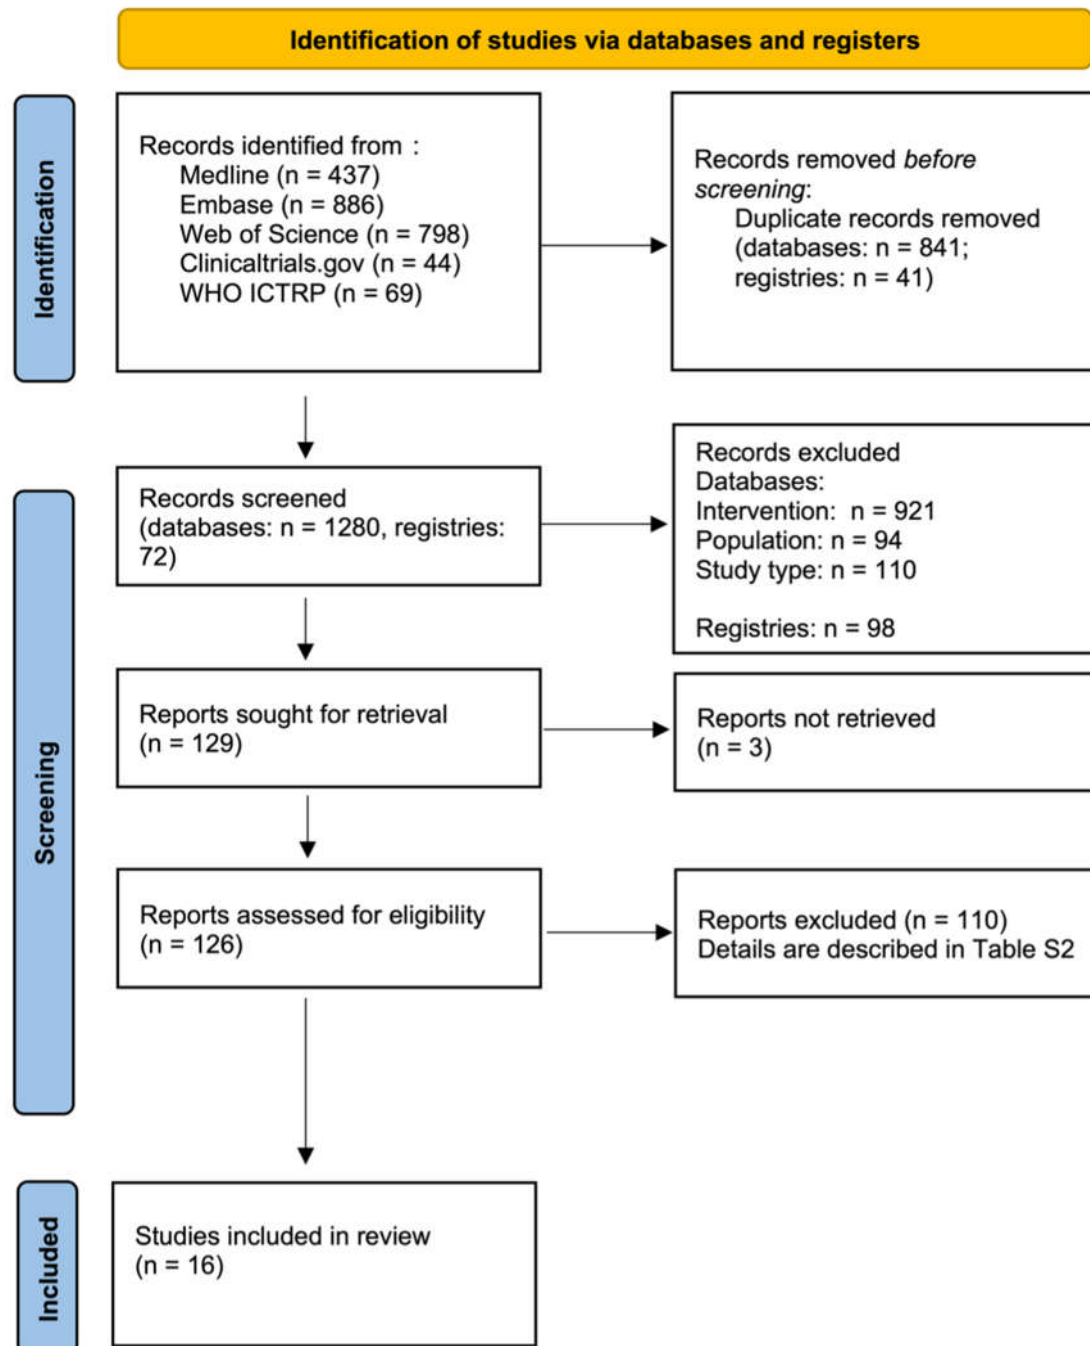

**Figure S1. PRISMA Flow Diagram of Studies Describing Prediction of Incident Atrial Fibrillation in a Population without Prior AF.**

**Table S2. Excluded Studies for Prediction of Incident Atrial Fibrillation in Population without Prior AF.**

| Study                        | Reason for exclusion                                                                        |
|------------------------------|---------------------------------------------------------------------------------------------|
| Acharya et al. 2008 [1]      | Study was about detection, rather than prediction of atrial fibrillation                    |
| Ahlberg et al. 2018 [2]      | Not enough information for 2x2 table                                                        |
| Ahsanuzzaman et al. 2020 [3] | Not enough information for 2x2 table                                                        |
| Anetta et al. 2022 [4]       | Patient cohort was entirely cardiology-based patients                                       |
| Arvaneh et al. 2009 [5]      | Not observational cohort study; evaluated on MIT-BIH dataset                                |
| Attia et al. 2019 [6]        | Study included patients with known history of AF                                            |
| Baek et al. 2021 [7]         | Study was about detection, rather than prediction of atrial fibrillation                    |
| Barbieri et al. 2022 [8]     | Study predicted cardiovascular events in general rather than atrial fibrillation or flutter |
| Bertsimas et al. 2021 [9]    | Study was about detection, rather than prediction of atrial fibrillation                    |
| Boon et al. 2018 [10]        | Not observational cohort study; evaluated on Physionet dataset                              |
| Boon et al. 2016 [11]        | Not observational cohort study; evaluated on Physionet dataset                              |
| Bratt et al. 2019 [12]       | Study included patients with known history of AF                                            |
| Bui et al. 2020 [13]         | Text not accessible                                                                         |
| Bundy et al. 2020 [14]       | Does not use machine learning for prediction                                                |
| Cho et al. 2018 [15]         | Model trained and evaluated only on patients with AF                                        |
| Chua et al. 2019 [16]        | Study included patients with known history of AF                                            |
| De Giovanni et al. 2017 [17] | Study included patients with known history of AF                                            |
| Castro et al. 2021 [18]      | Study included patients with known history of AF                                            |
| Chen et al. 2020 [19]        | Study included patients with known history of AF                                            |



|                                      |                                                                                                         |
|--------------------------------------|---------------------------------------------------------------------------------------------------------|
| De Jong et al. 2021 [20]             | Does not use machine learning-based prediction models                                                   |
| Derevitskii et al. 2021 [21]         | Includes patients with underlying medical condition                                                     |
| Ebrahimzadeh et al. 2018 [22]        | Study included patients with known history of AF                                                        |
| Egmont-Petersen et al. 1999 [23]     | Includes patients with underlying medical condition (treated with cardiac surgery)                      |
| Erdenebeyer et al. 2009 [24]         | Study included patients with known history of AF                                                        |
| Faulx et al. 2021 [25]               | Study type was not research article                                                                     |
| Fernandez-Fernandez et al. 2019 [26] | Study type was not research article                                                                     |
| Filos et al. 2017 [27]               | Study included patients with known history of AF                                                        |
| ElMoaqet et al. 2017 [28]            | Study was performed on animals, not humans                                                              |
| Firyulina et al. 2020 [29]           | Study classified, rather than predicted, atrial fibrillation                                            |
| Fujita et al. 2019 [30]              | Study classified, rather than predicted, atrial fibrillation                                            |
| Gilon et al. 2020 [31]               | Study excluded patients on pacemakers, but did not explicitly exclude patients with known history of AF |
| Gonzalez-Cordero et al. 2021 [32]    | Study included patients with known history of AF                                                        |
| Gregoire et al. 2020 [33]            | Study does not include information about patient cohort                                                 |
| Gregoire et al. 2022 [34]            | Study included patients with known history of AF                                                        |
| Gregoire et al. 2020 [35]            | Study does not include information about patient cohort                                                 |
| Gregoire et al. 2021 [36]            | Study does not include information about patient cohort                                                 |
| Gregoire et al. 2019 [37]            | Study does not include information about patient cohort                                                 |
| Grout et al. 2021 [38]               | Model in study was based on logistic regression                                                         |
| Guo et al. 2021 [39]                 | Study does not include information about patient cohort                                                 |
| Hayn et al. 2007 [40]                | Text not accessible                                                                                     |

|                              |                                                                                                                                                                                                                                                                                                                            |
|------------------------------|----------------------------------------------------------------------------------------------------------------------------------------------------------------------------------------------------------------------------------------------------------------------------------------------------------------------------|
| Henry et al. 2022 [41]       | Study does not exclude patients with known history of AF                                                                                                                                                                                                                                                                   |
| Heo et al. 2021 [42]         | Study is on a stroke cohort                                                                                                                                                                                                                                                                                                |
| Hill et al. 2018 [43]        | Preliminary study for Hill et al. 2019 [44]<br>Used LASSO logistic regression, neural networks, random forests, and SVM used to predict incidence of AF. Logistic regression, neural networks, random forests, and SVM had AUC of 0.811, 0.811, 0.812, and 0.818, respectively and all models outperformed Cox regression. |
| Hill et al. 2020 [45]        | Study protocol                                                                                                                                                                                                                                                                                                             |
| Hirota et al. 2020 [46]      | Model in study was based on logistic regression                                                                                                                                                                                                                                                                            |
| Hong et al. 2020 [47]        | Study included patients with known history of AF                                                                                                                                                                                                                                                                           |
| Hsieh et al. 2022 [48]       | Study included patients with known history of AF                                                                                                                                                                                                                                                                           |
| Hu et al. 2019 [49]          | Study included patients with known history of AF                                                                                                                                                                                                                                                                           |
| Jalali et al. 2020 [50]      | Study included patients with known history of AF                                                                                                                                                                                                                                                                           |
| Jyothi et al. 2022 [51]      | Text not accessible                                                                                                                                                                                                                                                                                                        |
| Karnik et al. 2012 [52]      | Study included patients with known history of AF                                                                                                                                                                                                                                                                           |
| Kastruiwale et al. 2021 [53] | Study included patients with known history of AF                                                                                                                                                                                                                                                                           |
| Kawakami et al. 2022 [54]    | Study included patients with known history of AF                                                                                                                                                                                                                                                                           |
| Kim et al. 2019 [55]         | Preliminary study on same dataset as Kim et al. 2020 [56]                                                                                                                                                                                                                                                                  |
| Kim et al. 2022 [57]         | Study was performed on patients with underlying conduction problems                                                                                                                                                                                                                                                        |
| Kordik et al. 2008 [58]      | Study classified, rather than predicted, atrial fibrillation                                                                                                                                                                                                                                                               |
| Krstacic et al. 2001 [59]    | Not observational cohort study                                                                                                                                                                                                                                                                                             |
| Kwon et al. 2022 [60]        | Study included patients with known history of AF                                                                                                                                                                                                                                                                           |
| Lehtonen et al. 2019 [61]    | Not primary research article                                                                                                                                                                                                                                                                                               |
| Li et al. 2021 [62]          | Not observational cohort study                                                                                                                                                                                                                                                                                             |

|                               |                                                                                         |
|-------------------------------|-----------------------------------------------------------------------------------------|
| Liu et al. 2021 [63]          | Study was performed on inpatients at a respiratory ward and not on a general population |
| Liu et al. 2021 [64]          | Study was performed on patients undergoing atrial appendage removal                     |
| Loring et al. 2020 [65]       | Study included patients with known history of AF                                        |
| Lou et al. 2022 [66]          | Study did not exclude patients with known history of AF                                 |
| Maghawry et al. 2021 [67]     | Not observational cohort study                                                          |
| McMillan et al. 2012 [68]     | Study did not exclude patients with known history of AF                                 |
| Melzi et al. 2021 [69]        | Study did not exclude patients with known history of AF                                 |
| Mendez et al. 2022 [70]       | Not observational cohort study                                                          |
| Mohebbi et al. 2011 [71]      | Not observational cohort study                                                          |
| Mohebbi et al. 2012 [72]      | Not observational cohort study                                                          |
| Mohebbi et al. 2011 [73]      | Not observational cohort study                                                          |
| Mroueh et al. 2019 [74]       | Not observational cohort study                                                          |
| Nadarajah et al. 2021 [75]    | Study protocol                                                                          |
| Okutucu et al. 2017 [76]      | Study was on patients with history of AF                                                |
| Parsi et al. 2021 [77]        | Not observational cohort study                                                          |
| Ponomartseva et al. 2021 [78] | Study was performed on patients with underlying hyperthyroidism                         |
| Pourbabaee et al. 2008 [79]   | Not observational cohort study                                                          |
| Raghunath et al. 2019 [80]    | Preliminary study on same dataset as Raghunath et al. 2021 [81]                         |
| Ramirez et al. 2021 [82]      | Does not give AUC or information to create a 2x2 table                                  |
| Ravens et al. 2015 [83]       | Study included patients with known history of AF                                        |
| Ravish et al. 2014 [84]       | Not observational cohort study                                                          |
| Safabakhsh et al. 2020 [85]   | Not observational cohort study                                                          |
| Shen et al. 2020 [86]         | Not observational cohort study                                                          |
| Sovilj et al. 2011 [87]       | Study included patients with known history of AF                                        |
| Sun et al. 2020 [88]          | Not observational cohort study                                                          |
| Surucu et al. 2021 [89]       | Not observational cohort study                                                          |
| Suzuki et al. 2022 [90]       | Study included patients with known history of AF                                        |
| Szep et al. 2019 [91]         | Not observational cohort study                                                          |
| Tabassum et al. 2016 [92]     | Not observational cohort study                                                          |
| Taggar et al. 2020 [93]       | Not primary research article                                                            |

|                           |                                                                               |
|---------------------------|-------------------------------------------------------------------------------|
| Talukdar et al. 2018 [94] | Primary outcome is not AF                                                     |
| Tieleman et al. 2019 [95] | Article not in English                                                        |
| Tse et al. 2020 [96]      | Patients had underlying mitral valve stenosis                                 |
| Tzou et al. 2021 [97]     | Study included patients with known history of AF                              |
| Wang et al. 2021 [98]     | Not observational cohort study                                                |
| Wang et al. 2022 [99]     | Primary outcome was not incidence of AF                                       |
| Wang et al. 2022 [100]    | Not observational cohort study                                                |
| Wehbe et al. 2020 [101]   | Not primary research article                                                  |
| Wu et al. 2021 [102]      | Not observational cohort study                                                |
| Xie et al. 2021 [103]     | Not primary research article                                                  |
| Xin et al. 2017 [104]     | Not observational cohort study                                                |
| Yang et al. 2022 [105]    | Study included patients with known history of AF                              |
| Ye et al. 2021 [106]      | Study was about classification, rather than prediction of atrial fibrillation |
| Zhang et al. 2020 [107]   | Not observational cohort study                                                |
| Zhang et al. 2022 [108]   | Not observational cohort study                                                |
| NCT02307032               | No results available                                                          |
| NCT03130985               | All patients had undergone cardiac surgery                                    |
| NCT03937089               | No results available                                                          |
| NCT04045639               | Data published in Hill et al. [44]                                            |
| NCT03357926               | No results available                                                          |
| NCT01171040               | Did not use machine learning                                                  |
| NCT01405209               | No results available                                                          |
| NCT04655443               | Did not use machine learning                                                  |
| NCT05045742               | No results available                                                          |
| ISRCTN17993837            | No results available                                                          |
| ACTRN12620000929909       | No results available                                                          |
| JPRN-UMIN000031719        | Did not use machine learning                                                  |
| JPRN-UMIN000020676        | No results available                                                          |
| JPRN-UMIN000007911        | No results available                                                          |
| JPRN-UMIN000005419        | Did not use machine learning                                                  |
| JPRN-UMIN000004536        | No results available                                                          |
| ISRCTN62172102            | No results available                                                          |

**Table S3. Population Characteristics of Studies for Prediction of Atrial Fibrillation in General Population**

| Study                             | Country        | Study population (% prevalence)                 | Eligibility criteria                                                                                         | Follow-up period (Study dates)            | Study aims                                                                                                                         |
|-----------------------------------|----------------|-------------------------------------------------|--------------------------------------------------------------------------------------------------------------|-------------------------------------------|------------------------------------------------------------------------------------------------------------------------------------|
| Ahmad et al. 2020[109]            | Lebanon        | n = 232 (ratio not provided)                    | Patients with no history of stroke or AF                                                                     | 3 months (not provided)                   | Use left atrium strain to predict AF                                                                                               |
| Ambale-Venkatesh et al. 2017[110] | United States  | n = 6,814 (4.7%)                                | Free of cardiovascular disease at enrolment                                                                  | 12 years (Baseline between 2000-2002)     | Characterize cardiovascular risk, predict outcomes, and identify biomarkers                                                        |
| Christopoulos et al. 2020[111]    | United States  | n = 1936 (17.2%)                                | Documented to be free of AF and no AF at baseline. At least one sinus EKG within 2 years before baseline     | 10 years (Baseline 2004 and 2012)         | Relationship of AI model with clinical risk scores and performance of AI model                                                     |
| Hill et al. 2019[44]              | United Kingdom | n = 2,994,287 (3.2%)                            | >30 years of age and no history of AF in 5 years prior to study period                                       | 11 years (Study period Jan 2006-Dec 2016) | Develop clinically applicable risk prediction model to identify between baseline and time-varying factors and identification of AF |
| Hirota et al. 2021[112]           | Japan          | n = 11,732 (0.8%)                               | No history of AF and sinus EKG at and within 30 days of initial visit                                        | 8 years (2010-2018)                       | Assess predictive capability of parameters obtained from EKG                                                                       |
| Hu et al. 2019[113]               | Taiwan         | n = 682,237 (2.1%)                              | >18 years of age and no diagnosis of AF before initial visit, with complete medical information              | 13 years (2000-2013)                      | Develop AI model to predict AF for an Asian population                                                                             |
| Joo et al. 2020[114]              | South Korea    | n = 297,875 (3.0% at 2 years;12.3% at 10 years) | No history of AF, coronary artery disease, heart failure, hemorrhagic stroke, ischemic stroke                | 2 years/10 years (Baseline 2003)          | Develop AI model to predict AF for an Asian population, compare short- and long-term risk, evaluate physician bias                 |
| Kaminski et al. 2022[115]         | United States  | n = 1403 (3.1%)                                 | No history of AF with sinus 12-lead EKG performed at initial visit and not used for ECG-AI model development | 1 year (2017-2020)                        | Validate performance of ECG-AI on external cohort                                                                                  |

|                           |                                                   |                                                                                                                 |                                                                                                                                            |                                                                       |                                                                                                                                             |
|---------------------------|---------------------------------------------------|-----------------------------------------------------------------------------------------------------------------|--------------------------------------------------------------------------------------------------------------------------------------------|-----------------------------------------------------------------------|---------------------------------------------------------------------------------------------------------------------------------------------|
| Khurshid et al. 2022[116] | United States, United Kingdom (validation cohort) | C3PO cohort: n = 87899 (12.9 per 1000 person years)<br>UK biobank cohort n = 41,033 (4.2 per 1000 person years) | Internal validation: 18-90 years of age without history of AF<br>External validation: 40-69 years of age without history of AF             | 5 years (2000-2019; C3PO)<br>2 years (2006-2010; UK Biobank)          | Develop AI model to predict time to AF                                                                                                      |
| Kim et al. 2020[56]       | South Korea                                       | n = 432,587 (1.4%)                                                                                              | >18 years of age without diagnosis of AF or valvular AF or change in ZIP code or missing data                                              | 4 years (2009-2013)                                                   | Find risk factors for incident AF using machine learning and regression methods                                                             |
| Kim et al. 2020[117]      | South Korea                                       | n= 258,896 (not reported)                                                                                       | Middle-aged individuals free of CVD at baseline                                                                                            | 3 years (2009-2013)                                                   | Compare the contribution of different data types in prediction of AF                                                                        |
| Lip et al. 2022[118]      | United States                                     | n = 617,483 (0.49 per person years)                                                                             | Medicaid patients aged between 18 to 90 years with at least 30 months enrolment and at least 24 months without diagnosis of AF at baseline | 5 years (2016-2021)                                                   | Report incidence of AF in Medicaid population and use AI models to predict AF incidence and complications accounting for demographic groups |
| Raghunath et al. 2021[81] | United States                                     | n = 287,593 (3.5%)                                                                                              | >18 years of age without history of AF with ECG available without significant artefact                                                     | 1 year (1996 -2020)                                                   | Use AI model to predict new-onset AF in patients without history of AF                                                                      |
| Schnabel et al. 2023[119] | Germany                                           | n = 1,476,391 (6.7%)                                                                                            | >18 years of age without history of AF                                                                                                     | 2 years (2013-2015)                                                   | Identify set of routinely available AF- and stroke-related AF risk predictors and integrate into AI model                                   |
| Sekelj et al. 2021[120]   | United Kingdom                                    | n = 604,135 (3.9%)                                                                                              | >30 years of age and no history of AF in 5 years prior to study period                                                                     | 16 years (2001-2016)                                                  | Externally validate model in Hill et al. 2019 <sup>17</sup>                                                                                 |
| Tiwari et al. 2020[121]   | United States                                     | n = 2,252,219 (1.2%)                                                                                            | Patients without a history of AF                                                                                                           | 7 years (incident AF predicted multiple 6-month intervals; 2011-2018) | Develop and test AI model for AF prediction                                                                                                 |

**Table S4. Characteristics of Models for Prediction of Atrial Fibrillation in the General Population.**

| Study                                    | Input data                                                       | Data source/<br>Data curated<br>for approved<br>access?                                  | Model                    | Model<br>architecture*  | Validation                                                                               | Results   | Model<br>interpretation | Code or<br>model<br>available | Model<br>currently<br>available for<br>clinical use? | Reported<br>handling of<br>sparse data |
|------------------------------------------|------------------------------------------------------------------|------------------------------------------------------------------------------------------|--------------------------|-------------------------|------------------------------------------------------------------------------------------|-----------|-------------------------|-------------------------------|------------------------------------------------------|----------------------------------------|
| Ahmad et al.<br>2020[109]                | Clinical<br>features,<br>strain value                            | Retrospective<br>Local EHR/no                                                            | New                      | Adaboost                | Unclear                                                                                  | AUC: 0.82 | No                      | Neither                       | No                                                   | No                                     |
| Ambale-<br>Venkatesh et<br>al. 2017[110] | ECG<br>parameters,<br>clinical<br>features,<br>biomarker<br>data | Prospective<br>Database<br>(MESA<br>cohort)/yes                                          | New                      | Random forest           | Internal                                                                                 | AUC: 0.86 | Yes                     | Neither                       | No                                                   | Yes<br>(adaptive<br>imputation)        |
| Christopoulos<br>et al. 2020[111]        | ECG trace,<br>clinical data                                      | Prospective<br>Multiple local<br>EHRs (MCSA<br>cohort)/<br>yes                           | ECG-<br>AI <sup>29</sup> | CNN + Cox<br>regression | Internal <sup>a</sup>                                                                    | AUC: 0.72 | No                      | Neither                       | No                                                   | No                                     |
| Hill et al.<br>2019[44]                  | Clinical<br>features                                             | Retrospective<br>database/yes                                                            | New                      | Neural<br>network       | External                                                                                 | AUC: 0.83 | Yes                     | Neither                       | No                                                   | No                                     |
| Hirota et al.<br>2021[112]               | ECG<br>parameters                                                | Retrospective<br>database<br>(Shinken<br>database<br>cohort)/no                          | New                      | Random forest           | Internal                                                                                 | AUC: 0.99 | Yes                     | Neither                       | No                                                   | No                                     |
| Hu et al.<br>2019[113]                   | Clinical<br>features                                             | Retrospective<br>database<br>(Taiwan<br>National<br>Health<br>Insurance<br>Database)/yes | New                      | Random forest           | Internal;<br>Validation<br>on larger<br>cohort (incl.<br>study<br>cohort)<br>AUC: 0.850. | AUC: 0.95 | Yes                     | Neither                       | No                                                   | No                                     |

|                           |                               |                                                                        |                      |                                                                               |                       |                                                                           |     |         |    |                                          |
|---------------------------|-------------------------------|------------------------------------------------------------------------|----------------------|-------------------------------------------------------------------------------|-----------------------|---------------------------------------------------------------------------|-----|---------|----|------------------------------------------|
| Joo et al. 2020[114]      | Clinical features             | Retrospective (Korean National Health Insurance Database)/yes          | New                  | Neural network*, random forest, lightGBM*                                     | Internal              | 2 years<br>AUC: 0.78<br><br>10 years<br>AUC: 0.75                         | Yes | Neither | No | No                                       |
| Kaminski et al. 2022[115] | ECG trace, clinical data      | Multiple retrospective local EHR/no                                    | ECG-AI <sup>29</sup> | CNN + Cox regression                                                          | Internal <sup>a</sup> | AUC: 0.74                                                                 | No  | Neither | No | No                                       |
| Khurshid et al. 2022[116] | ECG traces, clinical features | Retrospective databases/yes                                            | New                  | CNN + Cox regression                                                          | External              | Internal validation – AUC:0.84<br>External validation – average AUC: 0.76 | Yes | Neither | No | Yes (but not in training)                |
| Kim et al. 2020[117]      | Clinical features             | Retrospectived atabase (Korean National Health Insurance database)/yes | New                  | SVM, decision tree, random forest*, Naïve Bayes, deep neural network, XGBoost | Internal              | AUC: 0.95                                                                 | Yes | Neither | No | No (patients with missing data excluded) |
| Kim et al. 2020[117]      | Clinical features             | Retrospective database (Korean National Health Insurance database)/yes | New                  | Neural Network                                                                | Internal              | AUC: 0.69                                                                 | No  | Neither | No | No                                       |
| Lip et al. 2022[118]      | Clinical features             | Retrospective database/yes                                             | New                  | Neural network                                                                | Internal              | AUC: 0.84                                                                 | No  | Neither | No | No                                       |



|                           |                               |                                              |                                |                                                                                          |                                                          |                                                             |     |         |    |    |
|---------------------------|-------------------------------|----------------------------------------------|--------------------------------|------------------------------------------------------------------------------------------|----------------------------------------------------------|-------------------------------------------------------------|-----|---------|----|----|
| Raghunath et al. 2021[81] | ECG traces, clinical features | Multiple retrospective local EHRs/no         | New                            | CNN                                                                                      | External (simulated by splitting data based on hospital) | AUC: 0.84<br>Simulated external validation<br>AUC: 0.85     | No  | Neither | No | No |
| Schnabel et al. 2023[119] | Clinical features             | Retrospective database/proprietary           | New                            | Gradient boosted trees                                                                   | Temporal and external                                    | AUC: 0.82 (temporal validation), 0.76 (external validation) | Yes | Neither | No | No |
| Sekelj et al. 2021[120]   | Clinical features             | Retrospective database (DISCOVER cohort)/yes | Hill et al. 2019 <sup>17</sup> | Neural network                                                                           | External                                                 | AUC: 0.87                                                   | No  | Neither | No | No |
| Tiwari et al. 2020[121]   | Clinical features             | Multiple retrospective local EHRs/no         | New                            | Naïve Bayes, Logistic regression, Random forest, Gradient boosted trees, Neural network* | Internal                                                 | AUC: 0.80                                                   | No  | Neither | No | No |

<sup>a</sup>Model proposed in Attia et al. 2019 [6] (not included in this study) was originally developed for detection rather than prediction of atrial fibrillation.

\*Best-performing model if multiple models were tested

**Table S5. Features Used in Final Model Training.**

| Features \ Studies        | Ahmad et al. 2020 [109] | Ambale-Venkatesh et al. 2020 | Christopoulos et al. 2020 | Hill et al. 2019 [44] | Hirota et al. 2021 [112] | Hu et al. 2019 [113] | Joo et al. 2020 [114] | Kaminski et al. 2022 [115] | Khurshid et al. 2022 [116] | Kim et al. 2020 [56] | Kim et al. 2020 [117]* | Lip et al. 2022 [118] | Rabinstein et al. 2021 [119] | Raghunath et al. 2021 [81] | Reinke et al. 2018 [120] | Schnabel et al. 2023 [121] | Sekelj et al. 2021 [122] | Shan et al. 2014 [123] | Tiwari et al. 2020 [124] |
|---------------------------|-------------------------|------------------------------|---------------------------|-----------------------|--------------------------|----------------------|-----------------------|----------------------------|----------------------------|----------------------|------------------------|-----------------------|------------------------------|----------------------------|--------------------------|----------------------------|--------------------------|------------------------|--------------------------|
| Age                       | X                       | X                            | X                         | X                     |                          | X                    | X                     |                            | X                          | X                    | X                      | X                     |                              | X                          |                          | X                          | X                        |                        |                          |
| Sex                       |                         | X                            |                           | X                     |                          | X                    | X                     |                            | X                          |                      | X                      | X                     |                              | X                          |                          | X                          |                          |                        |                          |
| Race                      |                         | X                            | X                         | X                     |                          |                      |                       |                            | X                          |                      |                        |                       |                              |                            |                          |                            |                          |                        |                          |
| BMI/obesity               | X                       | X                            | X                         | X                     |                          |                      | X                     |                            | X                          | X                    | X                      | X                     |                              |                            |                          |                            | X                        |                        | X                        |
| Blood pressure            |                         | X                            | X                         | X                     |                          |                      | X                     |                            | X                          | X                    | X                      |                       |                              |                            |                          |                            | X                        |                        | X                        |
| Heart rate                |                         | X                            |                           |                       |                          |                      |                       |                            |                            |                      |                        |                       |                              |                            |                          |                            |                          |                        |                          |
| Hypoxemia                 |                         |                              |                           |                       |                          |                      |                       |                            |                            |                      |                        |                       |                              |                            |                          |                            |                          |                        | X                        |
| Creatinine                |                         | X                            |                           |                       |                          |                      |                       |                            |                            |                      |                        |                       |                              |                            |                          |                            |                          |                        |                          |
| Blood sugar               |                         | X                            |                           |                       |                          |                      |                       |                            |                            | X                    |                        |                       |                              |                            |                          |                            |                          |                        |                          |
| GGT                       |                         |                              |                           |                       |                          |                      | X                     |                            |                            | X                    |                        |                       |                              |                            |                          |                            |                          |                        |                          |
| HMG                       |                         |                              |                           |                       |                          |                      | X                     |                            |                            | X                    |                        |                       |                              |                            |                          |                            |                          |                        |                          |
| Gross proteinuria         |                         |                              |                           |                       |                          |                      | X                     |                            |                            |                      |                        |                       |                              |                            |                          |                            |                          |                        |                          |
| Hypokalemia               |                         |                              |                           |                       |                          |                      |                       |                            |                            |                      |                        |                       |                              |                            |                          |                            |                          |                        | X                        |
| SAST                      |                         |                              |                           |                       |                          |                      | X                     |                            |                            | X                    |                        |                       |                              |                            |                          |                            |                          |                        |                          |
| SALT                      |                         |                              |                           |                       |                          |                      | X                     |                            |                            | X                    |                        |                       |                              |                            |                          |                            |                          |                        |                          |
| Cholesterol/triglycerides |                         | X                            |                           |                       |                          | X                    | x                     |                            |                            | X                    |                        |                       |                              |                            |                          |                            |                          |                        | X                        |
| Diabetes                  |                         | X                            | X                         | X                     |                          | X                    | X                     | X                          | X                          | X                    |                        | X                     |                              |                            |                          |                            |                          |                        | X                        |
| GERD                      |                         |                              |                           |                       |                          |                      |                       |                            |                            |                      |                        |                       |                              |                            |                          |                            |                          |                        | X                        |
| Diarrhea                  |                         |                              |                           |                       |                          |                      |                       |                            |                            |                      |                        |                       |                              |                            |                          |                            |                          |                        | X                        |
| Smoking                   |                         | X                            | X                         | X                     |                          |                      | X                     |                            | X                          | X                    | X                      |                       |                              |                            |                          |                            |                          |                        |                          |
| Exercise                  |                         | X                            |                           |                       |                          |                      | X                     |                            |                            |                      |                        |                       |                              |                            |                          |                            |                          |                        |                          |
| Alcohol                   |                         | X                            |                           |                       |                          |                      | X                     |                            |                            | X                    |                        |                       |                              |                            |                          |                            |                          |                        |                          |
| Pregnancy                 |                         |                              |                           |                       |                          |                      |                       |                            |                            |                      |                        |                       |                              |                            |                          |                            |                          |                        | X                        |
| Family history of CVD     |                         | X                            |                           |                       |                          |                      |                       |                            |                            |                      | X                      |                       |                              |                            |                          |                            |                          |                        | X                        |
| Peripheral pain           |                         |                              |                           |                       |                          |                      |                       |                            |                            |                      |                        |                       |                              |                            |                          |                            |                          |                        | X                        |
| Nausea/fever/dizziness    |                         |                              |                           |                       |                          |                      |                       |                            |                            |                      |                        |                       |                              |                            |                          |                            |                          |                        | X                        |
| Headache                  |                         |                              |                           |                       |                          |                      |                       |                            |                            |                      |                        |                       |                              |                            |                          |                            |                          |                        | X                        |
| Infection/vaccination     |                         |                              |                           |                       |                          |                      |                       |                            |                            |                      |                        |                       |                              |                            |                          |                            |                          |                        | x                        |

|                               |   |   |   |   |   |   |   |   |   |   |   |  |  |  |   |   |  |  |   |
|-------------------------------|---|---|---|---|---|---|---|---|---|---|---|--|--|--|---|---|--|--|---|
| Allergic rhinitis             |   |   |   |   |   |   |   |   |   |   |   |  |  |  |   |   |  |  | X |
| Emphysema                     |   | X |   |   |   |   |   |   |   |   |   |  |  |  |   |   |  |  |   |
| Asthma                        |   | X |   |   |   |   |   |   |   |   | X |  |  |  |   |   |  |  | X |
| COPD                          |   |   |   |   | X |   |   |   | X |   | X |  |  |  |   |   |  |  | X |
| Acute bronchitis              |   |   |   |   |   |   |   |   |   |   |   |  |  |  |   |   |  |  | X |
| Sleep apnea                   |   |   |   |   | X |   |   |   |   |   | X |  |  |  |   |   |  |  | X |
| Rheumatologic disease         |   |   |   |   | X |   |   |   |   |   |   |  |  |  |   |   |  |  |   |
| Thyroid disease               |   |   |   |   |   |   |   |   |   |   | X |  |  |  |   |   |  |  | X |
| Arthritis                     |   | X |   |   |   |   |   |   |   |   | X |  |  |  |   |   |  |  | X |
| Spondylosis                   |   |   |   |   |   |   |   |   |   |   | X |  |  |  |   |   |  |  |   |
| Lower limb ulcer              |   |   |   |   |   |   |   |   |   |   |   |  |  |  | X |   |  |  |   |
| Cancer                        |   | X |   |   | X | X |   |   |   |   |   |  |  |  |   |   |  |  |   |
| Constipation                  |   |   |   |   |   |   |   |   |   |   |   |  |  |  |   |   |  |  | X |
| Cognitive impairment/anxiety  |   |   |   |   |   |   |   |   |   |   | X |  |  |  |   |   |  |  | X |
| Liver disease                 |   | X |   |   |   |   |   |   |   |   | X |  |  |  |   |   |  |  |   |
| Gout                          |   |   |   |   | X |   |   |   |   |   |   |  |  |  |   |   |  |  |   |
| CKD/ESRD                      |   |   |   |   | X |   |   |   | X | X | X |  |  |  | X |   |  |  |   |
| Dysuria                       |   |   |   |   |   |   |   |   |   |   |   |  |  |  |   |   |  |  | X |
| Anemia                        |   |   |   |   | X |   |   |   |   |   |   |  |  |  |   |   |  |  | X |
| Major bleeding                |   |   |   |   |   |   |   |   |   |   | X |  |  |  |   |   |  |  |   |
| Hypertension (chronic)        |   |   |   | X | X | X | X |   | X |   | X |  |  |  | X |   |  |  | X |
| Heart failure                 | X |   | X | X | X |   | X | X | X | X | X |  |  |  | X |   |  |  |   |
| CAD/MI                        | X |   | X | X | X |   |   | X | X | X | X |  |  |  | X |   |  |  | X |
| CVA/TIA                       |   |   |   |   | X |   | X |   | X |   | X |  |  |  | X |   |  |  |   |
| Peripheral Artery Disease     |   |   |   |   |   |   |   |   |   |   | X |  |  |  |   |   |  |  |   |
| Congenital Heart Disease      |   |   |   | X |   |   |   |   |   |   |   |  |  |  |   |   |  |  |   |
| Valvular Heart Disease        | X |   |   |   |   |   |   |   |   |   | X |  |  |  | X |   |  |  |   |
| Pulmonary Heart Disease       |   |   |   |   |   |   |   |   |   |   |   |  |  |  | X |   |  |  |   |
| Murmur Presence               | X |   |   |   |   |   |   |   |   |   |   |  |  |  |   |   |  |  |   |
| Other arrhythmias/Tachycardia |   |   |   |   |   |   |   |   |   |   |   |  |  |  | X |   |  |  | X |
| Cardiovascular Drugs          | X | X | X | X |   |   | X |   | X | X | X |  |  |  | X | X |  |  | X |
| Other drugs                   |   |   |   |   |   |   |   |   |   |   |   |  |  |  |   |   |  |  | X |
| Site                          |   | X |   |   |   |   |   |   |   |   |   |  |  |  |   |   |  |  |   |

|                                        |   |   |   |  |   |   |  |   |   |   |   |   |   |   |   |   |  |   |  |
|----------------------------------------|---|---|---|--|---|---|--|---|---|---|---|---|---|---|---|---|--|---|--|
| CHA <sub>2</sub> DS <sub>2</sub> -VASc |   |   |   |  |   | X |  | X |   |   |   |   | X |   |   |   |  |   |  |
| MRI measurements                       |   | X |   |  |   |   |  |   |   |   |   |   |   |   |   |   |  |   |  |
| Atherosclerosis (CT/US)                |   | X |   |  |   |   |  |   |   |   |   |   |   |   |   |   |  |   |  |
| Echo parameters                        | X | X |   |  |   |   |  |   |   |   |   |   |   |   |   |   |  |   |  |
| ECG traces                             |   |   | X |  |   |   |  | X | X |   |   |   |   | X | X |   |  |   |  |
| ECG parameters                         |   | X |   |  | X |   |  |   |   |   |   |   |   |   |   | X |  |   |  |
| PPG parameters                         |   |   |   |  |   |   |  |   |   |   |   |   |   |   |   |   |  | X |  |
| Blood Biomarkers**                     |   | X |   |  |   |   |  |   |   |   |   |   |   |   |   |   |  |   |  |
| Socioeconomic                          |   | X |   |  |   |   |  |   |   | X | X | X |   |   |   |   |  |   |  |

BMI: Body Mass Index; GGT: Gamma-Glutamyl Transferase; HMG: Hemoglobin; SAST: Serum Aspartate Aminotransferase; SALT: Serum Alanine Aminotransferase; GERD: Gastro-esophageal Reflux Disease; CVD: Cardiovascular Disease; COPD: Chronic Obstructive Pulmonary Disease; CKD: Chronic Kidney Disease; ESRD: End-stage Renal Disease; CAD: Coronary Artery Disease; MI: Myocardial Infarction; CVA: Cerebrovascular Accident; TIA: Transient Ischemic Attack; MRI: Magnetic Resonance Imaging; CT: Computed Tomography; US: Ultrasound; ECG: Electrocardiogram; PPG: Photoplethysmography

\*Not clear as factors not explicitly enumerated and had to be inferred.

\*\* Interleukin-2 soluble receptor, plasmin-antiplasmin complex, d-dimer, Factor VIII, NT-proBNP (N-Terminal Pro-B-Type Natriuretic Peptide), cardiac troponin-T, C-reactive protein, interleukin-6, fibrinogen, homocysteine, tissue necrosis factor- $\alpha$  soluble receptor

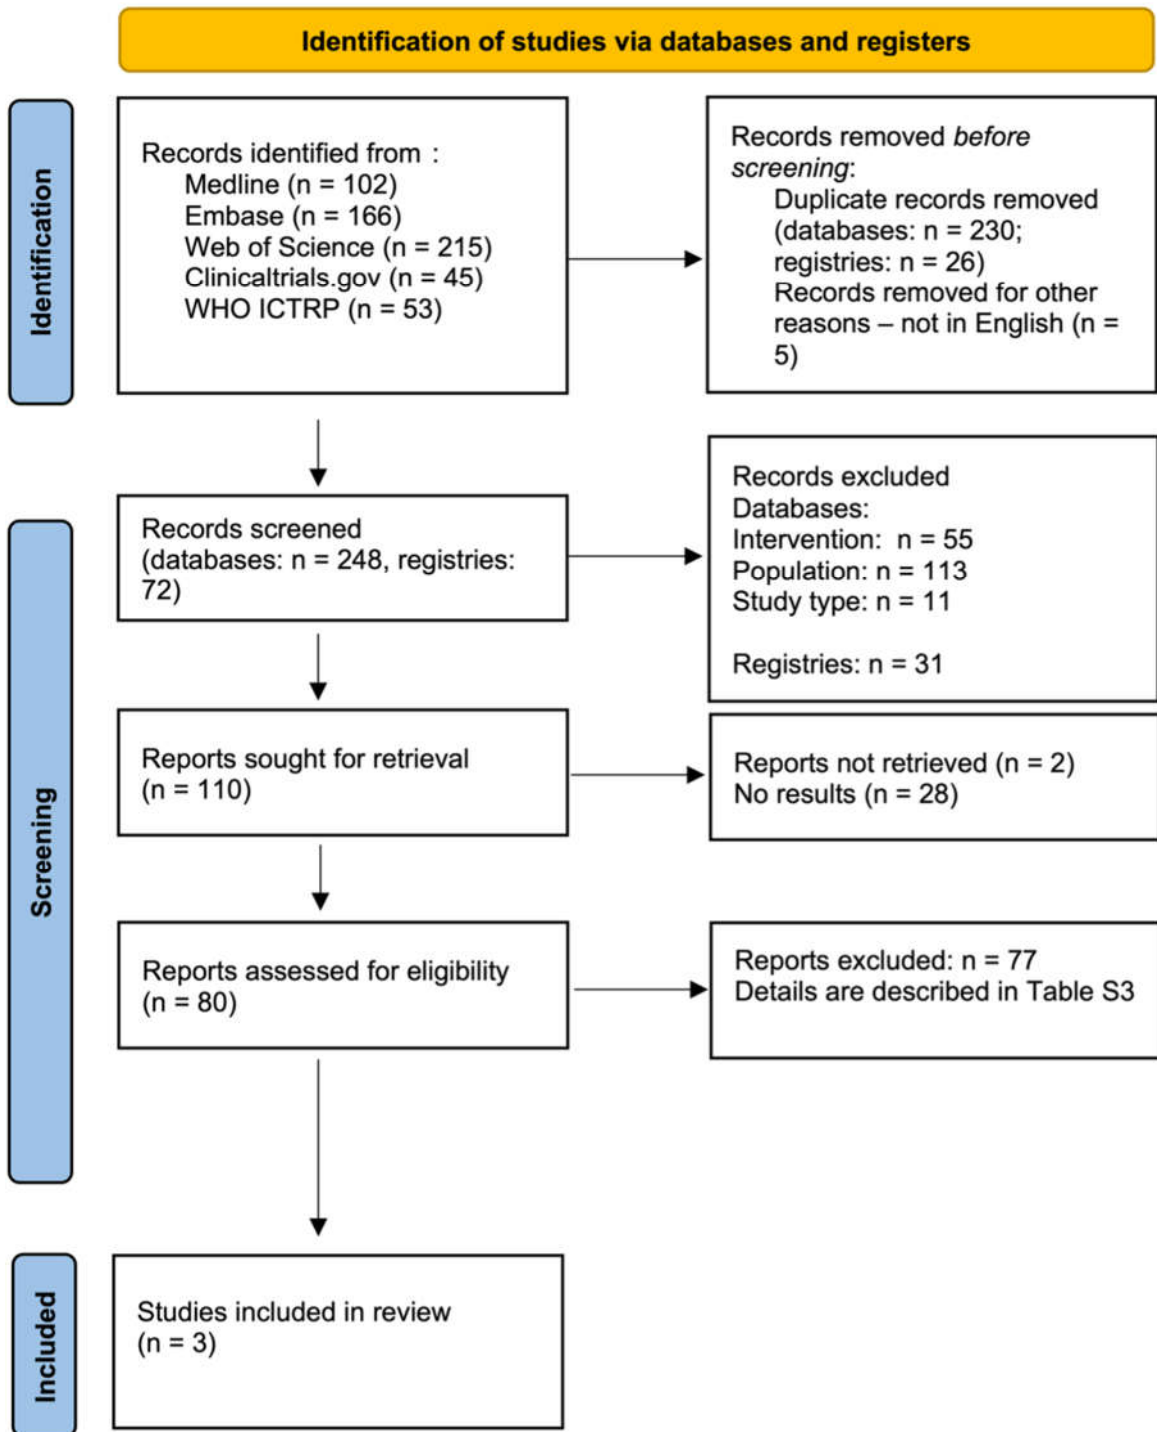

Figure S2. PRISMA Flow Diagram of Studies Describing Detection of Atrial Fibrillation in a Stroke Population.

**Table S6. Excluded Studies for Detection of Atrial Fibrillation after Stroke.**

| Study                         | Reason for exclusion                               |
|-------------------------------|----------------------------------------------------|
| Abdul-Kadir et al. [125]      | Not stroke cohort                                  |
| Baek et al. [7]               | Not stroke cohort                                  |
| Bahrami et al. [126]          | Not stroke cohort                                  |
| Ben Itzhak et al. [127]       | Not stroke cohort                                  |
| Chantercrob et al. [128]      | Not stroke cohort                                  |
| Couceiro et al. [129]         | Not stroke cohort                                  |
| Duverney et al. [130]         | Not stroke cohort                                  |
| Eerikainen et al. [131]       | Not stroke cohort                                  |
| Fan et al. [132]              | Not stroke cohort                                  |
| Faust et al. [133]            | Not stroke cohort                                  |
| Helfenbein et al. [134]       | Not stroke cohort                                  |
| Ivanovic et al. [135]         | Not stroke cohort                                  |
| Jia et al. [136]              | Not stroke cohort                                  |
| Kennedy et al. [137]          | Not stroke cohort                                  |
| Kim et al. [138]              | Not stroke cohort                                  |
| Krol-Jozaga et al. [139]      | Not stroke cohort                                  |
| Lee et al. [140]              | Not stroke cohort                                  |
| Lee et al. 2017 [141]         | Not stroke cohort                                  |
| Lee et al. 2020 [142]         | Not stroke cohort                                  |
| Lei et al. 2021 [143]         | Not stroke cohort                                  |
| Leutheuser et al. 2015 [144]  | Not stroke cohort                                  |
| Liaqat et al. 2020 [145]      | Not stroke cohort                                  |
| Liu et al. 2022 [146]         | Not stroke cohort                                  |
| Medic et al. 2021 [147]       | Does not measure outcomes required for this review |
| Mittal et al. 2021 [148]      | Not stroke cohort                                  |
| Mousavi et al. 2020 [149]     | Not stroke cohort                                  |
| Nguyen et al. 2019 [150]      | Not stroke cohort                                  |
| Nuryani et al. 2015 [151]     | Not stroke cohort                                  |
| Park et al. 2009 [152]        | Not stroke cohort                                  |
| Pereira et al. 2019 [153]     | Not stroke cohort                                  |
| Pham et al. 2021 [154]        | Not stroke cohort                                  |
| Piccini et al. 2021 [155]     | Does not measure outcomes required for this review |
| Piorkowski et al. 2019 [156]  | Not stroke cohort                                  |
| Pokaprakarn et al. 2022 [157] | Not stroke cohort                                  |
| Pollock et al. 2020 [158]     | Not stroke cohort                                  |
| Qayyum et al. 2018 [159]      | Not stroke cohort                                  |
| Quartieri et al. 2019 [160]   | Not stroke cohort                                  |
| Rahul et al. 2022 [161]       | Not stroke cohort                                  |
| Rosa et al. 2021 [162]        | Not stroke cohort                                  |
| Sahu et al. 2022 [163]        | Not stroke cohort                                  |
| Sandberg et al. 2021 [164]    | Not stroke cohort                                  |

|                                                                  |                                                         |
|------------------------------------------------------------------|---------------------------------------------------------|
| Sasaki et al. 2019 [165]                                         | Not stroke cohort                                       |
| Schäck et al. 2017 [166]                                         | Not stroke cohort                                       |
| Sideswar et al. 2021 [167]                                       | Not stroke cohort                                       |
| Sims et al. 2021 [168]                                           | Does not measure outcomes required for this review      |
| Sun et al. 2022 [169]                                            | Not stroke cohort                                       |
| Tadi et al. 2019 [170]                                           | Not stroke cohort                                       |
| Taniguchi et al. 2021 [171]                                      | Not stroke cohort                                       |
| Tison et al. 2018 [172]                                          | Not stroke cohort                                       |
| Ukil et al. 2022 [173]                                           | Not stroke cohort                                       |
| Wang et al. 2022 [100]                                           | Does not measure outcomes required for this review      |
| Wong et al. 2022 [174]                                           | Study type is a protocol rather than a research article |
| Xia et al. 2018 [175]                                            | Not stroke cohort                                       |
| Yao et al. 2017 [176]                                            | Not stroke cohort                                       |
| Yokokawa et al. 2020 [177]                                       | Study included non-stroke patients                      |
| Yu et al. 2020 [178]                                             | Not stroke cohort                                       |
| Yue et al. 2019 [179]                                            | Not stroke cohort                                       |
| Zalabarría et al. 2020 [180]                                     | Not stroke cohort                                       |
| Zhu et al. 2022 [181]                                            | Not stroke cohort                                       |
| Clinical trial NCT0132554<br>Baturova et al. 2016 [182]          | Does not use machine learning                           |
| Clinical trial NCT01858779<br>Kallmunzer et al. 2015 [183]       | Does not use machine learning                           |
| Clinical trial NCT02725944<br>Skrebelyte-Strøm et al. 2022 [184] | Does not use machine learning                           |
| Clinical trial NCT02725944<br>Haeusler et al. 2016 [185]         | Does not use machine learning                           |
| Clinical trial NCT02204267<br>Haeusler et al. 2021 [186]         | Does not use machine learning                           |
| Clinical trial NCT02261766<br>Poulsen et al. 2016 [187]          | Does not use machine learning                           |
| Clinical trial NCT02578979<br>Huang et al. 2020 [188]            | Does not use machine learning                           |
| Clinical trial NCT00279981<br>Glotzer et al. 2009 [189]          | Not stroke cohort                                       |
| Clinical trial NCT01855035<br>Wachter et al. 2017 [190]          | Does not use machine learning                           |
| Clinical trial NCT02428140<br>Buck et al. 2021 [191]             | Does not use machine learning                           |
| Clinical trial NCT02270112<br>Brasier et al. 2019 [192]          | Not stroke cohort                                       |

|                            |                                                                           |
|----------------------------|---------------------------------------------------------------------------|
| Clinical trial NCT0372160  | Does not use machine learning                                             |
| NCT0350733                 | Not stroke cohort                                                         |
| Pereira et al. 2020 [193]  | Primary outcome was to classify quality of signal, rather than its nature |
| Schnabel et al. 2022 [121] | Study is about prediction rather than detection of stroke                 |
| Sung et al. 2022 [194]     | Study is about prediction rather than detection of stroke                 |
| Shan et al. 2016 [123]     | Does not exclude patients with history of AF                              |



**Table S7. Population Characteristics of Studies for Detection of Atrial Fibrillation in a Stroke Population.**

| Study                       | Country       | Study population (% prevalence) | Eligibility criteria                                         | Follow-up period (Study dates) | Study aims                                                                                                                                                                               |
|-----------------------------|---------------|---------------------------------|--------------------------------------------------------------|--------------------------------|------------------------------------------------------------------------------------------------------------------------------------------------------------------------------------------|
| Rabinstein et al. 2021[119] | United States | n = 265 (4.1%)                  | Patients admitted for embolic stroke of unknown cause (ESUS) | Up to 30 days (2018-2019)      | Test whether AI model can discriminate patients with embolic stroke of unknown cause and whether predicted AF probability is associated with AF identified through ambulatory monitoring |
| Reinke et al. 2018[120]     | Germany       | n = 105 (18%)                   | Patients admitted with cryptogenic stroke                    | 20 months (2013-2014)          | Assess ability of AI software to detect AF and develop cost-effective strategy to optimize detection of AF                                                                               |
| Shan et al. 2014[123]       | Taiwan        | n = 468 (not reported)          | Patients in stroke unit                                      | Not reported (2012-2014)       | Propose a photoplethysmography-based AI detection model of AF                                                                                                                            |

## References

1. Acharya, U.R.; Sankaranarayanan, M.; Nayak, J.; Xiang, C.; Tamura, T. Automatic identification of cardiac health using modeling techniques: A comparative study. *INFORMATION SCIENCES* **2008**, *178*, 4571-4582, doi:10.1016/j.ins.2008.08.006.
2. Ahlberg, G.; Wang, L.; Roselli, C.; Chaffin, M.; Hoan Choi, S.; Ghouse, J.; Hanso, S.; Svendsen, J.H.; Olesen, M.S.; Lubitz, S.; et al. The genetic risk and interactions in atrial fibrillation, evidence from 335,070 UK biobank participants. *European Heart Journal* **2018**, *39*, 870, doi:https://dx.doi.org/10.1093/eurheartj/ehy563.4346.
3. Ahsanuzzaman, S.M.; Ahmed, T.; Rahman, M.A.; Ieee. Low Cost, Portable ECG Monitoring and Alarming System Based on Deep Learning. In Proceedings of the 2020 IEEE REGION 10 SYMPOSIUM (TENSYP) - TECHNOLOGY FOR IMPACTFUL SUSTAINABLE DEVELOPMENT, 2020; pp. 316-319.
4. Anetta, K.; Horak, A.; Wojakowski, W.; Wita, K.; Jadczyk, T. Deep Learning Analysis of Polish Electronic Health Records for Diagnosis Prediction in Patients with Cardiovascular Diseases. *Journal of Personalized Medicine* **2022**, *12*, 869, doi:https://dx.doi.org/10.3390/jpm12060869.
5. Arvaneh, M.; Ahmadi, H.; Azemi, A.; Shajiee, M.; Dastgheib, Z.S.; Ieee. Prediction of Paroxysmal Atrial Fibrillation by Dynamic Modeling of the PR Interval of ECG. In Proceedings of the 2009 INTERNATIONAL CONFERENCE ON BIOMEDICAL AND PHARMACEUTICAL ENGINEERING, 2009; pp. 255-+.
6. Attia, Z.I.; Noseworthy, P.A.; Lopez-Jimenez, F.; Asirvatham, S.J.; Deshmukh, A.J.; Gersh, B.J.; Carter, R.E.; Yao, X.; Rabinstein, A.A.; Erickson, B.J.; et al. An artificial intelligence-enabled ECG algorithm for the identification of patients with atrial fibrillation during sinus rhythm: a retrospective analysis of outcome prediction. *Lancet (London, England)* **2019**, *394*, 861-867, doi:https://dx.doi.org/10.1016/S0140-6736(19)31721-0.
7. Baek, Y.S.; Lee, S.C.; Choi, W.; Kim, D.H. A new deep learning algorithm of 12-lead electrocardiogram for identifying atrial fibrillation during sinus rhythm. *SCIENTIFIC REPORTS* **2021**, *11*, doi:10.1038/s41598-021-92172-5.
8. Barbieri, S.; Mehta, S.; Wu, B.; Bharat, C.; Poppe, K.; Jorm, L.; Jackson, R. Predicting cardiovascular risk from national administrative databases using a combined survival analysis and deep learning approach. *International Journal of Epidemiology* **2022**, *51*, 931-944, doi:https://dx.doi.org/10.1093/ije/dyab258.
9. Bertsimas, D.; Mingardi, L.; Stellato, B. Machine Learning for Real-Time Heart Disease Prediction. *IEEE Journal of Biomedical and Health Informatics* **2021**, *25*, 3627-3637, doi:https://dx.doi.org/10.1109/JBHI.2021.3066347.
10. Boon, K.H.; Khalil-Hani, M.; Malarvili, M.B. Paroxysmal atrial fibrillation prediction based on HRV analysis and non-dominated sorting genetic algorithm III. *Computer Methods and Programs in Biomedicine* **2018**, *153*, 171-184, doi:https://dx.doi.org/10.1016/j.cmpb.2017.10.012.
11. Boon, K.H.; Khalil-Hani, M.; Malarvili, M.B.; Sia, C.W. Paroxysmal atrial fibrillation prediction method with shorter HRV sequences. *Computer Methods and Programs in Biomedicine* **2016**, *134*, 187-196, doi:https://dx.doi.org/10.1016/j.cmpb.2016.07.016.
12. Bratt, A.; Guenther, Z.; Hahn, L.D.; Kadoch, M.; Adams, P.L.; Leung, A.N.C.; Guo, H.H. Left Atrial Volume as a Biomarker of Atrial Fibrillation at Routine Chest CT:

- Deep Learning Approach. *Radiology. Cardiothoracic imaging* **2019**, 1, e190057, doi:<https://dx.doi.org/10.1148/ryct.2019190057>.
13. Bui, C.T.; Huynh, P.K.; Phan, H.T.; Le, T.Q.; Toi, V.V. Developing Neural-fuzzy-based Unscented Kalman Filter Algorithm for Atrial Fibrillation Onset Prediction. In Proceedings of the 7TH INTERNATIONAL CONFERENCE ON THE DEVELOPMENT OF BIOMEDICAL ENGINEERING IN VIETNAM (BME7): TRANSLATIONAL HEALTH SCIENCE AND TECHNOLOGY FOR DEVELOPING COUNTRIES, 2020; pp. 119-125.
  14. Bundy, J.D.; Heckbert, S.R.; Chen, L.Y.; Lloyd-Jones, D.M.; Greenland, P. Evaluation of Risk Prediction Models of Atrial Fibrillation (from the Multi-Ethnic Study of Atherosclerosis [MESA]). *American Journal of Cardiology* **2020**, 125, 55-62, doi:<https://dx.doi.org/10.1016/j.amjcard.2019.09.032>.
  15. Cho, J.; Kim, Y.; Lee, M. Prediction to Atrial Fibrillation Using Deep Convolutional Neural Networks. In Proceedings of the PREDICTIVE INTELLIGENCE IN MEDICINE, 2018; pp. 164-171.
  16. Chua, W.; Purmah, Y.; Cardoso, V.R.; Gkoutos, G.V.; Tull, S.P.; Neculau, G.; Thomas, M.R.; Kotecha, D.; Lip, G.Y.H.; Kirchhof, P.; et al. Data-driven discovery and validation of circulating blood-based biomarkers associated with prevalent atrial fibrillation. *European heart journal* **2019**, 40, 1268-1276, doi:<https://dx.doi.org/10.1093/eurheartj/ehy815>.
  17. De Giovanni, E.; Aminifar, A.; Luca, A.; Yazdani, S.; Vesin, J.M.; Atienza, D.; Ieee. A Patient-Specific Methodology for Prediction of Paroxysmal Atrial Fibrillation Onset. In Proceedings of the 2017 COMPUTING IN CARDIOLOGY (CINC), 2017.
  18. Castro, H.; Garcia-Racines, J.D.; Bernal-Norena, A. Methodology for the prediction of paroxysmal atrial fibrillation based on heart rate variability feature analysis. *Heliyon* **2021**, 7, e08244, doi:<https://dx.doi.org/10.1016/j.heliyon.2021.e08244>.
  19. Chen, Y.H.; Twinge, A.H.; Badawi, D.; Danavi, J.; McCauley, M.; Cain, A.E.; Ieee. ATRIAL FIBRILLATION RISK PREDICTION FROM ELECTROCARDIOGRAM AND RELATED HEALTH DATA WITH DEEP NEURAL NETWORK. In Proceedings of the 2020 IEEE INTERNATIONAL CONFERENCE ON ACOUSTICS, SPEECH, AND SIGNAL PROCESSING, 2020; pp. 1269-1273.
  20. de Jong, V.M.T.; Moons, K.G.M.; Eijkemans, M.J.C.; Riley, R.D.; Debray, T.P.A. Developing more generalizable prediction models from pooled studies and large clustered data sets. *Statistics in Medicine* **2021**, 40, 3533-3559, doi:<https://dx.doi.org/10.1002/sim.8981>.
  21. Derevitskii, I.V.; Savitskaya, D.A.; Babenko, A.Y.; Kovalchuk, S.V. Hybrid predictive modelling: Thyrotoxic atrial fibrillation case. *JOURNAL OF COMPUTATIONAL SCIENCE* **2021**, 51, doi:10.1016/j.jocs.2021.101365.
  22. Ebrahimzadeh, E.; Kalantari, M.; Joulani, M.; Shahraki, R.S.; Fayaz, F.; Ahmadi, F. Prediction of paroxysmal Atrial Fibrillation: A machine learning based approach using combined feature vector and mixture of expert classification on HRV signal. *Computer methods and programs in biomedicine* **2018**, 165, 53-67, doi:<https://dx.doi.org/10.1016/j.cmpb.2018.07.014>.
  23. Egmont-Petersen, M.; Dassen, W.R.M.; Reiber, J.H.C. Sequential selection of discrete features for neural networks - A Bayesian approach to building a cascade. *PATTERN RECOGNITION LETTERS* **1999**, 20, 1439-1448, doi:10.1016/S0167-8655(99)00112-9.

24. Erdenebayar, U.; Kim, H.; Park, J.-U.; Kang, D.; Lee, K.-J. Automatic Prediction of Atrial Fibrillation Based on Convolutional Neural Network Using a Short-term Normal Electrocardiogram Signal. *Journal of Korean medical science* **2019**, *34*, e64, doi:https://dx.doi.org/10.3346/jkms.2019.34.e64.
25. Faulx, M.D. Predicting incident atrial fibrillation using single channel nocturnal oximetry: Can necessity become the mother of intervention? *Annals of the American Thoracic Society* **2021**, *18*, 952-954, doi:https://dx.doi.org/10.1513/AnnalsATS.202103-281ED.
26. Fernandez-Fernandez, F.J. Electrocardiographic predictors of atrial fibrillation: prolonged P-wave and Bayes syndrome. *Journal of hypertension* **2019**, *37*, 454-455, doi:https://dx.doi.org/10.1097/HJH.0000000000001990.
27. Filos, D.; Chouvarda, I.; Tachmatzidis, D.; Vassilikos, V.; Maglaveras, N. Beat-to-beat P-wave morphology as a predictor of paroxysmal atrial fibrillation. *Computer methods and programs in biomedicine* **2017**, *151*, 111-121, doi:https://dx.doi.org/10.1016/j.cmpb.2017.08.016.
28. ElMoaqet, H.; Almuwaqat, Z.; Ryalat, M.; Almtireen, N. A New Algorithm for Short Term Prediction of Persistent Atrial Fibrillation. In Proceedings of the 2017 IEEE JORDAN CONFERENCE ON APPLIED ELECTRICAL ENGINEERING AND COMPUTING TECHNOLOGIES (AEECT), 2017.
29. Firyulina, M.A.; Kashirina, I.L.; Iop. Classification of cardiac arrhythmia using machine learning techniques. In Proceedings of the APPLIED MATHEMATICS, COMPUTATIONAL SCIENCE AND MECHANICS: CURRENT PROBLEMS, 2020.
30. Fujita, H.; Cimr, D. Decision support system for arrhythmia prediction using convolutional neural network structure without preprocessing. *APPLIED INTELLIGENCE* **2019**, *49*, 3383-3391, doi:10.1007/s10489-019-01461-0.
31. Gilon, C.; Gregoire, J.M.; Bersini, H.; Ieee. Forecast of paroxysmal atrial fibrillation using a deep neural network. In Proceedings of the 2020 INTERNATIONAL JOINT CONFERENCE ON NEURAL NETWORKS (IJCNN), 2020.
32. Gonzalez-Cordero, A.F.; Duconge-Soler, J.; Franqui-Rivera, H.; Feliu-Maldonado, R.; Roche-Lima, A.; Almodovar-Rivera, I. Insight on the Genetics of Atrial Fibrillation in Puerto Rican Hispanics. *Stroke research and treatment* **2021**, *2021*, 8819896, doi:https://dx.doi.org/10.1155/2021/8819896.
33. Gregoire, J.; Gilon, C.; Subramanian, N.; Bersini, H. Forecasting episodes of atrial fibrillation using a new machine learning algorithm. *Archives of Cardiovascular Diseases Supplements* **2020**, *12*, 103, doi:https://dx.doi.org/10.1016/j.acvdsp.2019.09.225.
34. Gregoire, J.-M.; Gilon, C.; Carlier, S.; Bersini, H. Role of the autonomic nervous system and premature atrial contractions in short-term paroxysmal atrial fibrillation forecasting: Insights from machine learning models. *Archives of cardiovascular diseases* **2022**, *115*, 377-387, doi:https://dx.doi.org/10.1016/j.acvd.2022.04.006.
35. Gregoire, J.M.; Gilon, C.; Carlier, S.; Bersini, H. Unravelling the black box of machine learning for atrial fibrillation forecast: Role of heart rate variability and of premature beats. *European Heart Journal* **2020**, *41*, 671, doi:https://dx.doi.org/10.1093/ehjci/ehaa946.0671.
36. Gregoire, J.M.; Gilon, C.; Carlier, S.; Bersini, H. Influence of autonomic nervous system on atrial fibrillation trigger, as assessed by machine learning. *Acta Cardiologica* **2021**, *76*, 12, doi:https://dx.doi.org/10.1080/00015385.2021.1880175.

37. Gregoire, J.M.; Subramanian, N.; Papazian, D.; Bersini, H. Forecasting atrial fibrillation using machine learning techniques. *European Heart Journal* **2019**, *40*, 4163, doi:<https://dx.doi.org/10.1093/eurheartj/ehz746.1157>.
38. Grout, R.W.; Hui, S.L.; Imler, T.D.; El-Azab, S.; Baker, J.; Sands, G.H.; Ateya, M.; Pike, F. Development, validation, and proof-of-concept implementation of a two-year risk prediction model for undiagnosed atrial fibrillation using common electronic health data (UNAFIED). *BMC medical informatics and decision making* **2021**, *21*, 112, doi:<https://dx.doi.org/10.1186/s12911-021-01482-1>.
39. Guo, Y.T.; Cui, Y.; Zhao, C.; Liu, L.; Li, L.; Chen, M. Machine-learning fusion approach for the prediction of atrial fibrillation onset using photoplethysmographic-based smart device. *European Heart Journal* **2021**, *42*, 3058, doi:<https://dx.doi.org/10.1093/eurheartj/ehab724.3058>.
40. Hayn, D.; Kollmann, A.; Schreier, G. Predicting initiation and termination of atrial fibrillation from the ECG. *Biomedizinische Technik. Biomedical engineering* **2007**, *52*, 5-10.
41. Henry, C.; Singh, J.P.; Fontanarava, J.; de Masse, G.; Carbonati, T.; Gardella, C.; Fiorina, L.; Li, J. SHORT TERM PREDICTION OF ATRIAL FIBRILLATION FROM AMBULATORY ECG USING DEEP LEARNING. *Journal of the American College of Cardiology* **2022**, *79*, 2015, doi:<https://dx.doi.org/10.1016/S0735-1097%2822%2903006-6>.
42. Heo, T.S.; Kim, C.; Kim, J.D.; Park, C.Y.; Kim, Y.S. Prediction of Atrial Fibrillation Cases: Convolutional Neural Networks Using the Output Texts of Electrocardiography. *SENSORS AND MATERIALS* **2021**, *33*, 393-404, doi:10.18494/SAM.2021.3023.
43. Hill, N.R.; Ayoubkhani, D.; Lumley, M.; Lister, S.; Farooqui, U.; Clifton, D.; O'Neil, M.; McEwan, P.; Gordon, J. Machine learning to detect and diagnose atrial fibrillation and atrial flutter (AF/F) using routine clinical data. *Value in Health* **2018**, *21*, S213.
44. Hill, N.R.; Ayoubkhani, D.; McEwan, P.; Sugrue, D.M.; Farooqui, U.; Lister, S.; Lumley, M.; Bakhai, A.; Cohen, A.T.; O'Neill, M.; et al. Predicting atrial fibrillation in primary care using machine learning. *PloS one* **2019**, *14*, e0224582, doi:<https://dx.doi.org/10.1371/journal.pone.0224582>.
45. Hill, N.R.; Arden, C.; Beresford-Hulme, L.; Camm, A.J.; Clifton, D.; Davies, D.W.; Farooqui, U.; Gordon, J.; Groves, L.; Hurst, M.; et al. Identification of undiagnosed atrial fibrillation patients using a machine learning risk prediction algorithm and diagnostic testing (PULsE-AI): Study protocol for a randomised controlled trial. *Contemporary clinical trials* **2020**, *99*, 106191, doi:<https://dx.doi.org/10.1016/j.cct.2020.106191>.
46. Hirota, N.; Suzuki, S.; Arita, T.; Yagi, N.; Otsuka, T.; Semba, H.; Kano, H.; Matsuno, S.; Kato, Y.; Uejima, T.; et al. Prediction of atrial fibrillation by 12-lead electrocardiogram parameters in patients without structural heart disease. *European Heart Journal* **2020**, *41*, 536, doi:<https://dx.doi.org/10.1093/ehjci/ehaa946.0536>.
47. Hong, S.D.; Wang, C.; Fu, Z.J. Gated temporal convolutional neural network and expert features for diagnosing and explaining physiological time series: A case study on heart rates. *COMPUTER METHODS AND PROGRAMS IN BIOMEDICINE* **2021**, *200*, doi:10.1016/j.cmpb.2020.105847.
48. Hsieh, J.-C.; Shih, H.; Xin, L.-L.; Yang, C.-C.; Han, C.-L. 12-lead ECG signal processing and atrial fibrillation prediction in clinical practice. *Technology and health*

- care : official journal of the European Society for Engineering and Medicine **2022**, doi:https://dx.doi.org/10.3233/THC-212925.
49. Hu, W.S. TCTAP A-001 A Novel Atrial Fibrillation Prediction Model for Asian Subjects - A Nationwide Cohort Study. *Journal of the American College of Cardiology* **2019**, 73, S1, doi:https://dx.doi.org/10.1016/j.jacc.2019.03.026.
  50. Jalali, A.; Lee, M. Atrial Fibrillation Prediction With Residual Network Using Sensitivity and Orthogonality Constraints. *IEEE journal of biomedical and health informatics* **2020**, 24, 407-413, doi:https://dx.doi.org/10.1109/JBHI.2019.2957809.
  51. Jyothi, S.; Nelloru, G. Predicting arrhythmia, atrial fibrillation from electrocardiogram signals using Pivot Range Fitness Scale-Based Machine Learning Model. *INTERNATIONAL JOURNAL OF INTELLIGENT UNMANNED SYSTEMS*, doi:10.1108/IJIUS-11-2021-0140.
  52. Karnik, S.; Tan, S.L.; Berg, B.; Glurich, I.; Zhang, J.F.; Vidaillet, H.J.; Page, C.D.; Chowdhary, E.; Ieee. Predicting Atrial Fibrillation and Flutter using Electronic Health Records. In Proceedings of the 2012 ANNUAL INTERNATIONAL CONFERENCE OF THE IEEE ENGINEERING IN MEDICINE AND BIOLOGY SOCIETY (EMBC), 2012; pp. 5562-5565.
  53. Kasturiwale, H.P.; Kale, S.N. BioSignal modelling for prediction of cardiac diseases using intra group selection method. *INTELLIGENT DECISION TECHNOLOGIES-NETHERLANDS* **2021**, 15, 151-160, doi:10.3233/IDT-200058.
  54. Kawakami, M.; Karashima, S.; Morita, K.; Tada, H.; Okada, H.; Aono, D.; Kometani, M.; Nomura, A.; Demura, M.; Furukawa, K.; et al. Explainable Machine Learning for Atrial Fibrillation in the General Population Using a Generalized Additive Model - A Cross-Sectional Study. *Circulation reports* **2022**, 4, 73-82, doi:https://dx.doi.org/10.1253/circrep.CR-21-0151.
  55. Kim, I.S.; Yang, P.S.; Yu, H.T.; Kim, T.H.; Uhm, J.S.; Pak, H.N.; Lee, M.H.; Kim, J.Y.; Joung, B. Clinical applications of machine learning for prediction of incident atrial fibrillation from the general population: A nationwide cohort study. *European Heart Journal* **2019**, 40, 3579, doi:https://dx.doi.org/10.1093/eurheartj/ehz746.0651.
  56. Kim, I.-S.; Yang, P.-S.; Jang, E.; Jung, H.; You, S.C.; Yu, H.T.; Kim, T.-H.; Uhm, J.-S.; Pak, H.-N.; Lee, M.-H.; et al. Long-term PM2.5 exposure and the clinical application of machine learning for predicting incident atrial fibrillation. *Sci Rep* **2020**, 10, 16324, doi:10.1038/s41598-020-73537-8.
  57. Kim, M.; Kang, Y.; You, S.C.; Park, H.-D.; Lee, S.-S.; Kim, T.-H.; Yu, H.T.; Choi, E.-K.; Park, H.-S.; Park, J.; et al. Artificial intelligence predicts clinically relevant atrial high-rate episodes in patients with cardiac implantable electronic devices. *Scientific reports* **2022**, 12, 37, doi:https://dx.doi.org/10.1038/s41598-021-03914-4.
  58. Kordik, P.; Kremen, V.; Lhotska, L. The GAME algorithm applied to complex fractionated atrial electrograms data set. In Proceedings of the ARTIFICIAL NEURAL NETWORKS - ICANN 2008, PT II, 2008; pp. 859-+.
  59. Krstacic, G.; Gamberger, D.; Smuc, T.; Krstacic, A.; Ieee; Ieee. Some important R-R interval based paroxysmal atrial fibrillation predictors. In Proceedings of the COMPUTERS IN CARDIOLOGY 2001, VOL 28, 2001; pp. 409-412.
  60. Kwon, O.-S.; Hong, M.; Kim, T.-H.; Hwang, I.; Shim, J.; Choi, E.-K.; Lim, H.E.; Yu, H.T.; Uhm, J.-S.; Joung, B.; et al. Genome-wide association study-based prediction of atrial fibrillation using artificial intelligence. *Open heart* **2022**, 9, doi:https://dx.doi.org/10.1136/openhrt-2021-001898.

61. Lehtonen, A.O.; Niiranen, T.J. Electrocardiographic predictors of atrial fibrillation: prolonged P-wave and Bayes syndrome Reply. *JOURNAL OF HYPERTENSION* **2019**, *37*, 455-455, doi:10.1097/HJH.0000000000001991.
62. Li, Z.; Derksen, H.; Gryak, J.; Jiang, C.; Gao, Z.; Zhang, W.; Ghanbari, H.; Gunaratne, P.; Najarian, K. Prediction of cardiac arrhythmia using deterministic probabilistic finite-state automata. *Biomedical Signal Processing and Control* **2021**, *63*, 102200, doi:https://dx.doi.org/10.1016/j.bspc.2020.102200.
63. Liu, X.L.; Liu, T.B.; Zhang, Z.B.; Kuo, P.C.; Xu, H.R.; Yang, Z.C.; Lan, K.; Li, P.Y.; Ouyang, Z.C.; Ng, Y.L.; et al. TOP-Net Prediction Model Using Bidirectional Long Short-term Memory and Medical-Grade Wearable Multisensor System for Tachycardia Onset: Algorithm Development Study. *JMIR MEDICAL INFORMATICS* **2021**, *9*, doi:10.2196/18803.
64. Liu, Y.; Liu, N.; Bai, F.; Liu, Q. Identifying ceRNA Networks Associated With the Susceptibility and Persistence of Atrial Fibrillation Through Weighted Gene Co-Expression Network Analysis. *Frontiers in genetics* **2021**, *12*, 653474, doi:https://dx.doi.org/10.3389/fgene.2021.653474.
65. Loring, Z.; Mehrotra, S.; Piccini, J.P.; Camm, J.; Carlson, D.; Fonarow, G.C.; Fox, K.A.A.; Peterson, E.D.; Pieper, K.; Kakkar, A.K. Machine learning does not improve upon traditional regression in predicting outcomes in atrial fibrillation: an analysis of the ORBIT-AF and GARFIELD-AF registries. *Europace : European pacing, arrhythmias, and cardiac electrophysiology : journal of the working groups on cardiac pacing, arrhythmias, and cardiac cellular electrophysiology of the European Society of Cardiology* **2020**, *22*, 1635-1644, doi:https://dx.doi.org/10.1093/europace/euaa172.
66. Lou, Y.-S.; Lin, C.-S.; Fang, W.-H.; Lee, C.-C.; Ho, C.-L.; Wang, C.-H.; Lin, C. Artificial Intelligence-Enabled Electrocardiogram Estimates Left Atrium Enlargement as a Predictor of Future Cardiovascular Disease. *Journal of personalized medicine* **2022**, *12*, doi:https://dx.doi.org/10.3390/jpm12020315.
67. Maghawry, E.; Ismail, R.; Gharib, T.E. An efficient approach for Paroxysmal Atrial Fibrillation events prediction using Extreme Learning Machine. *JOURNAL OF INTELLIGENT & FUZZY SYSTEMS* **2021**, *40*, 5087-5099, doi:10.3233/JIFS-201832.
68. McMillan, S.; Bauman, Z.; Horst, H.M.; Gassner, M.; Blyden, D.; Syed, Z.; Rubinfeld, I. Computational prediction of atrial fibrillation in the intensive care unit using early admission vital signs data. *Critical Care Medicine* **2012**, *40*, 60, doi:https://dx.doi.org/10.1097/01.ccm.0000425605.04623.4b.
69. Melzi, P.; Tolosana, R.; Cecconi, A.; Sanz-Garcia, A.; Ortega, G.J.; Jimenez-Borreguero, L.J.; Vera-Rodriguez, R. Analyzing artificial intelligence systems for the prediction of atrial fibrillation from sinus-rhythm ECGs including demographics and feature visualization. *Scientific reports* **2021**, *11*, 22786, doi:https://dx.doi.org/10.1038/s41598-021-02179-1.
70. Mendez, M.M.; Hsu, M.C.; Yuan, J.T.; Lynn, K.S. A Heart Rate Variability-Based Paroxysmal Atrial Fibrillation Prediction System. *APPLIED SCIENCES-BASEL* **2022**, *12*, doi:10.3390/app12052387.
71. Mohebbi, M.; Ghassemian, H. Prediction of paroxysmal atrial fibrillation using recurrence plot-based features of the RR-interval signal. *Physiological measurement* **2011**, *32*, 1147-1162, doi:https://dx.doi.org/10.1088/0967-3334/32/8/010.
72. Mohebbi, M.; Ghassemian, H. Prediction of paroxysmal atrial fibrillation based on non-linear analysis and spectrum and bispectrum features of the heart rate

- variability signal. *Computer methods and programs in biomedicine* **2012**, 105, 40-49, doi:<https://dx.doi.org/10.1016/j.cmpb.2010.07.011>.
73. Mohebbi, M.; Ghassemian, H.; Asl, B.M. Structures of the recurrence plot of heart rate variability signal as a tool for predicting the onset of paroxysmal atrial fibrillation. *Journal of medical signals and sensors* **2011**, 1, 113-121.
  74. Mroueh, M.; Mourad-Chehade, F.; Abdallah, F. Evidence-based prediction of Atrial Fibrillation using physiological signals. In Proceedings of the 2019 3RD INTERNATIONAL CONFERENCE ON BIO-ENGINEERING FOR SMART TECHNOLOGIES (BIOSMART), 2019.
  75. Nadarajah, R.; Wu, J.; Frangi, A.F.; Hogg, D.; Cowan, C.; Gale, C. Predicting patient-level new-onset atrial fibrillation from population-based nationwide electronic health records: protocol of FIND-AF for developing a precision medicine prediction model using artificial intelligence. *BMJ open* **2021**, 11, e052887, doi:<https://dx.doi.org/10.1136/bmjopen-2021-052887>.
  76. Okutucu, S.; Katircioglu-Ozturk, D.; Oto, E.; Guvenir, H.A.; Karaagaoglu, E.; Oto, A.; Meinertz, T.; Goette, A. Data mining experiments on the Angiotensin II-Antagonist in Paroxysmal Atrial Fibrillation (ANTIPAF-AFNET 2) trial: 'exposing the invisible'. *Europace : European pacing, arrhythmias, and cardiac electrophysiology : journal of the working groups on cardiac pacing, arrhythmias, and cardiac cellular electrophysiology of the European Society of Cardiology* **2017**, 19, 741-746, doi:<https://dx.doi.org/10.1093/europace/euw084>.
  77. Parsi, A.; Glavin, M.; Jones, E.; Byrne, D. Prediction of paroxysmal atrial fibrillation using new heart rate variability features. *Computers in biology and medicine* **2021**, 133, 104367, doi:<https://dx.doi.org/10.1016/j.compbimed.2021.104367>.
  78. Ponomartseva, D.A.; Derevitskii, I.V.; Kovalchuk, S.V.; Babenko, A.Y. Prediction model for thyrotoxic atrial fibrillation: a retrospective study. *BMC endocrine disorders* **2021**, 21, 150, doi:<https://dx.doi.org/10.1186/s12902-021-00809-3>.
  79. Pourbabaei, B.; Lucas, C.; Ieee. AUTOMATIC DETECTION AND PREDICTION OF PAROXYSMAL ATRIAL FIBRILLATION BASED ON ANALYZING ECG SIGNAL FEATURE CLASSIFICATION METHODS. In Proceedings of the 2008 CAIRO INTERNATIONAL BIOMEDICAL ENGINEERING CONFERENCE, 2008; pp. 193-196.
  80. Raghunath, S.M.; Cerna, A.U.; Jing, L.; VanMaanen, D.; Stough, J.V.; Hartzel, D.; Leader, J.; Good, C.; Fornwalt, B.K.; Haggerty, C.M. A deep neural network for predicting incident atrial fibrillation directly from 12-lead electrocardiogram traces. *Circulation* **2019**, 140, doi:[https://dx.doi.org/10.1161/circ.140.suppl\\_1.14407](https://dx.doi.org/10.1161/circ.140.suppl_1.14407).
  81. Raghunath, S.; Pfeifer, J.M.; Ulloa-Cerna, A.E.; Nemani, A.; Carbonati, T.; Jing, L.; vanMaanen, D.P.; Hartzel, D.N.; Ruhl, J.A.; Lagerman, B.F.; et al. Deep Neural Networks Can Predict New-Onset Atrial Fibrillation From the 12-Lead ECG and Help Identify Those at Risk of Atrial Fibrillation-Related Stroke. *Circulation* **2021**, 143, 1287-1298, doi:<https://dx.doi.org/10.1161/CIRCULATIONAHA.120.047829>.
  82. Ramirez, J.; Duijvenboden, S.V.; Young, W.J.; Orini, M.; Jones, A.R.; Lambiase, P.D.; Munroe, P.B.; Tinker, A. Analysing electrocardiographic traits and predicting cardiac risk in UK biobank. *JRSM Cardiovascular Disease* **2021**, 10, doi:<https://dx.doi.org/10.1177/20480040211023664>.
  83. Ravens, U.; Katircioglu-Ozturk, D.; Wettwer, E.; Christ, T.; Dobrev, D.; Voigt, N.; Poulet, C.; Loose, S.; Simon, J.; Stein, A.; et al. Application of the RIMARC algorithm



- to a large data set of action potentials and clinical parameters for risk prediction of atrial fibrillation. *Medical & biological engineering & computing* **2015**, 53, 263-273, doi:https://dx.doi.org/10.1007/s11517-014-1232-0.
84. Ravish, D.K.; Shenoy, N.R.; Shanthi, K.J.; Nisargh, S.; Ieee. Heart Function Monitoring, Prediction and Prevention of Heart Attacks: Using Artificial Neural Networks. In Proceedings of the 2014 INTERNATIONAL CONFERENCE ON CONTEMPORARY COMPUTING AND INFORMATICS (IC3I), 2014; pp. 1-6.
  85. Safabakhsh, S.; Zhao, R.; Laksman, Z. APPLYING A DEEP NEURAL NETWORK FOR AUTOMATED PREDICTION OF PAROXYSMAL ATRIAL FIBRILLATION ONSET. *Canadian Journal of Cardiology* **2020**, 36, S42-S43, doi:https://dx.doi.org/10.1016/j.cjca.2020.07.094.
  86. Shen, M.T.; Zhang, L.Q.; Luo, X.; Xu, J.; Publishing, I.O.P. Atrial Fibrillation Prediction Algorithm Based on Attention Model. In Proceedings of the 5TH ANNUAL INTERNATIONAL CONFERENCE ON INFORMATION SYSTEM AND ARTIFICIAL INTELLIGENCE (ISAI2020), 2020.
  87. Sovilj, S.; Rajsman, G.; Magjarevic, R. ECG based prediction of Atrial Fibrillation using Support Vector Classifier. *AUTOMATIKA* **2011**, 52, 58-67.
  88. Sun, L.; Wang, Y.; He, J.; Li, H.; Peng, D.; Wang, Y. A stacked LSTM for atrial fibrillation prediction based on multivariate ECGs. *Health information science and systems* **2020**, 8, 19, doi:https://dx.doi.org/10.1007/s13755-020-00103-x.
  89. Surucu, M.; Isler, Y.; Perc, M.; Kara, R. Convolutional neural networks predict the onset of paroxysmal atrial fibrillation: Theory and applications. *Chaos (Woodbury, N.Y.)* **2021**, 31, 113119, doi:https://dx.doi.org/10.1063/5.0069272.
  90. Suzuki, S.; Motogi, J.; Nakai, H.; Matsuzawa, W.; Takayanagi, T.; Umemoto, T.; Hirota, N.; Hyodo, A.; Satoh, K.; Otsuka, T.; et al. Identifying patients with atrial fibrillation during sinus rhythm on ECG: Significance of the labeling in the artificial intelligence algorithm. *International journal of cardiology. Heart & vasculature* **2022**, 38, 100954, doi:https://dx.doi.org/10.1016/j.ijcha.2022.100954.
  91. Szep, J.; Hariri, S.; Khalpey, Z.; Ieee. PREDICTIVE DIAGNOSIS OF FATAL HEART RHYTHMS USING WEARABLES. In Proceedings of the 2019 SPRING SIMULATION CONFERENCE (SPRINGSIM), 2019.
  92. Tabassum, T.; Islam, M.; Ieee. An Approach of Cardiac Disease Prediction by Analyzing ECG Signal. In Proceedings of the 2016 3RD INTERNATIONAL CONFERENCE ON ELECTRICAL ENGINEERING AND INFORMATION & COMMUNICATION TECHNOLOGY (ICEEICT), 2016.
  93. Taggar, J.S.; Qureshi, N.; Weng, S. Risk prediction of new AF: is there a role for artificial intelligence? *European journal of preventive cardiology* **2020**, 27, 1325-1327, doi:https://dx.doi.org/10.1177/2047487319879525.
  94. Talukdar, J.; Dewangan, B.K. Analysis of cardiovascular diseases using artificial neural network. In Proceedings of the 2018 FIFTH INTERNATIONAL CONFERENCE ON PARALLEL, DISTRIBUTED AND GRID COMPUTING (IEEE PDGC), 2018; pp. 132-137.
  95. Tieleman, R.G. [Predicting atrial fibrillation through a sinus-rhythm electrocardiogram; useful or not?]. *Atriumfibrilleren voorspellen met een sinusritme-ecg; wel of niet zinning?* **2019**, 163.
  96. Tse, G.; Lakhani, I.; Zhou, J.; Li, K.H.C.; Lee, S.; Liu, Y.; Leung, K.S.K.; Liu, T.; Baranchuk, A.; Zhang, Q. P-Wave Area Predicts New Onset Atrial Fibrillation in

- Mitral Stenosis: A Machine Learning Approach. *Frontiers in bioengineering and biotechnology* **2020**, 8, 479, doi:<https://dx.doi.org/10.3389/fbioe.2020.00479>.
97. Tzou, H.-A.; Lin, S.-F.; Chen, P.-S. Paroxysmal atrial fibrillation prediction based on morphological variant P-wave analysis with wideband ECG and deep learning. *Computer methods and programs in biomedicine* **2021**, 211, 106396, doi:<https://dx.doi.org/10.1016/j.cmpb.2021.106396>.
  98. Wang, L.-H.; Yan, Z.-H.; Yang, Y.-T.; Chen, J.-Y.; Yang, T.; Kuo, I.C.; Abu, P.A.R.; Huang, P.-C.; Chen, C.-A.; Chen, S.-L. A Classification and Prediction Hybrid Model Construction with the IQPSO-SVM Algorithm for Atrial Fibrillation Arrhythmia. *Sensors (Basel, Switzerland)* **2021**, 21, doi:<https://dx.doi.org/10.3390/s21155222>.
  99. Wang, X.; Khurshid, S.; Choi, S.H.; Friedman, S.; Weng, L.C.; Reeder, C.; Pirruccello, J.P.; Singh, P.; Lau, E.S.; Venn, R.; et al. Genetic Susceptibility to Atrial Fibrillation Identified via Deep Learning of 12-lead Electrocardiograms. *medRxiv* **2022**, doi:<https://dx.doi.org/10.1101/2022.01.17.22269357>.
  100. Wang, X.; Meng, X.; Meng, L.; Guo, Y.; Li, Y.; Yang, C.; Pei, Z.; Li, J.; Wang, F. Joint efficacy of the three biomarkers SNCA, GYPB and HBG1 for atrial fibrillation and stroke: Analysis via the support vector machine neural network. *Journal of Cellular and Molecular Medicine* **2022**, 26, 2010-2022, doi:<https://dx.doi.org/10.1111/jcmm.17224>.
  101. Wehbe, R.M.; Khan, S.S.; Shah, S.J.; Ahmad, F.S. Predicting High-Risk Patients and High-Risk Outcomes in Heart Failure. *HEART FAILURE CLINICS* **2020**, 16, 387-407, doi:10.1016/j.hfc.2020.05.002.
  102. Wu, C.; Hwang, M.; Huang, T.-H.; Chen, Y.-M.J.; Chang, Y.-J.; Ho, T.-H.; Huang, J.; Hwang, K.-S.; Ho, W.-H. Application of artificial intelligence ensemble learning model in early prediction of atrial fibrillation. *BMC bioinformatics* **2021**, 22, 93, doi:<https://dx.doi.org/10.1186/s12859-021-04000-2>.
  103. Xie, E.; Wu, C.; Ostovaneh, M.; Post, W.S.; Kutty, S.; Soliman, E.Z.; Bluemke, D.A.; Heckbert, S.R.; Lima, J.; Ambale-Venkatesh, B. Intermediate Markers Underlying Electrocardiographic Predictors of Incident Atrial Fibrillation: The MESA. *Circulation. Arrhythmia and electrophysiology* **2021**, 14, e009805, doi:<https://dx.doi.org/10.1161/CIRCEP.121.009805>.
  104. Xin, Y.; Zhao, Y. Paroxysmal atrial fibrillation recognition based on multi-scale wavelet alpha-entropy. *Biomedical engineering online* **2017**, 16, 121, doi:<https://dx.doi.org/10.1186/s12938-017-0406-z>.
  105. Yang, L.; Chen, Y.; Huang, W. Hub Genes Identification, Small Molecule Compounds Prediction for Atrial Fibrillation and Diagnostic Model Construction Based on XGBoost Algorithm. *Frontiers in cardiovascular medicine* **2022**, 9, 920399, doi:<https://dx.doi.org/10.3389/fcvm.2022.920399>.
  106. Ye, X.H.; Huang, Y.Q.; Lu, Q. Explainable Prediction of Cardiac Arrhythmia Using Machine Learning. In Proceedings of the 2021 14TH INTERNATIONAL CONGRESS ON IMAGE AND SIGNAL PROCESSING, BIOMEDICAL ENGINEERING AND INFORMATICS (CISP-BMEI 2021), 2021.
  107. Zhang, H.; Dong, Z.; Gao, J.; Lu, P.; Wang, Z. Automatic screening method for atrial fibrillation based on lossy compression of the electrocardiogram signal. *Physiological measurement* **2020**, 41, 075005, doi:<https://dx.doi.org/10.1088/1361-6579/ab979f>.
  108. Zhang, P.; Miao, Q.; Wang, X.; Zhang, Y.; Hou, Y. Identification of a Novel 4-gene Diagnostic Model for Atrial Fibrillation Risk Based on Integrated Analysis Across

- Independent Data Sets. *Combinatorial chemistry & high throughput screening* **2022**, 25, 229-240, doi:<https://dx.doi.org/10.2174/1386207324666210121103304>.
109. Ahmad, A.; Mansour, S.; Zgheib, A.; Safatly, L.; Hajj, A.E.; Baydoun, M.; Ghaziri, H.; Aridi, H.; Ismaeel, H. USING ARTIFICIAL INTELLIGENCE TO UNCOVER ASSOCIATION OF LEFT ATRIAL STRAIN WITH THE FRAMINGHAM RISK SCORE FOR ATRIAL FIBRILLATION DEVELOPMENT. *Journal of the American College of Cardiology* **2020**, 75, 455, doi:<https://dx.doi.org/10.1016/S0735-1097%2820%2931082-2>.
  110. Ambale-Venkatesh, B.; Yang, X.; Wu, C.O.; Liu, K.; Hundley, W.G.; McClelland, R.; Gomes, A.S.; Folsom, A.R.; Shea, S.; Guallar, E.; et al. Cardiovascular Event Prediction by Machine Learning: The Multi-Ethnic Study of Atherosclerosis. *Circulation research* **2017**, 121, 1092-1101, doi:<https://dx.doi.org/10.1161/CIRCRESAHA.117.311312>.
  111. Christopoulos, G.; Graff-Radford, J.; Lopez, C.L.; Yao, X.; Attia, Z.I.; Rabinstein, A.A.; Petersen, R.C.; Knopman, D.S.; Mielke, M.M.; Kremers, W.; et al. Artificial Intelligence-Electrocardiography to Predict Incident Atrial Fibrillation: A Population-Based Study. *Circulation. Arrhythmia and electrophysiology* **2020**, 13, e009355, doi:<https://dx.doi.org/10.1161/CIRCEP.120.009355>.
  112. Hirota, N.; Suzuki, S.; Arita, T.; Yagi, N.; Otsuka, T.; Kishi, M.; Semba, H.; Kano, H.; Matsuno, S.; Kato, Y.; et al. Prediction of current and new development of atrial fibrillation on electrocardiogram with sinus rhythm in patients without structural heart disease. *International journal of cardiology* **2021**, 327, 93-99, doi:<https://dx.doi.org/10.1016/j.ijcard.2020.11.012>.
  113. Hu, W.S.; Hsieh, M.H.; Lin, C.L. A novel atrial fibrillation prediction model for Chinese subjects: A nationwide cohort investigation of 682 237 study participants with random forest model. *Europace* **2019**, 21, 1307-1312, doi:<https://dx.doi.org/10.1093/europace/euz036>.
  114. Joo, G.; Song, Y.; Im, H.; Park, J. Clinical Implication of Machine Learning in Predicting the Occurrence of Cardiovascular Disease Using Big Data (Nationwide Cohort Data in Korea). *IEEE ACCESS* **2020**, 8, 157643-157653, doi:[10.1109/ACCESS.2020.3015757](https://doi.org/10.1109/ACCESS.2020.3015757).
  115. Kaminski, A.E.; Albus, M.L.; Ball, C.T.; White, L.J.; Sheele, J.M.; Attia, Z.I.; Friedman, P.A.; Adedinsewo, D.A.; Noseworthy, P.A. Evaluating atrial fibrillation artificial intelligence for the ED: statistical and clinical implications. *The American journal of emergency medicine* **2022**, 57, 98-102, doi:<https://dx.doi.org/10.1016/j.ajem.2022.04.032>.
  116. Khurshid, S.; Friedman, S.; Reeder, C.; Di Achille, P.; Diamant, N.; Singh, P.; Harrington, L.X.; Wang, X.; Al-Alusi, M.A.; Sarma, G.; et al. ECG-Based Deep Learning and Clinical Risk Factors to Predict Atrial Fibrillation. *Circulation* **2022**, 145, 122-133, doi:<https://dx.doi.org/10.1161/CIRCULATIONAHA.121.057480>.
  117. Kim, K.; Park, S.M. Artificial neural networks to compare the contribution of basic clinical factors, ESC SCORE, and multidimensional risk factors for cardiovascular event prediction performance: An observational study. *European Heart Journal* **2020**, 41, 2897, doi:<https://dx.doi.org/10.1093/ehjci/ehaa946.2897>.
  118. Lip, G.Y.H.; Genaidy, A.; Tran, G.; Marroquin, P.; Estes, C. Incidence and Complications of Atrial Fibrillation in a Low Socioeconomic and High Disability United States (US) Population: A Combined Statistical and Machine Learning

- Approach. *International journal of clinical practice* **2022**, 2022, 8649050, doi:https://dx.doi.org/10.1155/2022/8649050.
119. Rabinstein, A.A.; Yost, M.D.; Faust, L.; Kashou, A.H.; Latif, O.S.; Graff-Radford, J.; Attia, I.Z.; Yao, X.; Noseworthy, P.A.; Friedman, P.A. Artificial Intelligence-Enabled ECG to Identify Silent Atrial Fibrillation in Embolic Stroke of Unknown Source. *Journal of stroke and cerebrovascular diseases : the official journal of National Stroke Association* **2021**, 30, 105998, doi:https://dx.doi.org/10.1016/j.jstrokecerebrovasdis.2021.105998.
  120. Reinke, F.; Bettin, M.; Ross, L.S.; Kochhäuser, S.; Kleffner, I.; Ritter, M.; Minnerup, J.; Dechering, D.; Eckardt, L.; Dittrich, R. Refinement of detecting atrial fibrillation in stroke patients: results from the TRACK-AF Study. *European Journal of Neurology* **2018**, 25, 631-636, doi:https://doi.org/10.1111/ene.13538.
  121. Schnabel, R.B.; Witt, H.; Walker, J.; Ludwig, M.; Geelhoed, B.; Kossack, N.; Schild, M.; Miller, R.; Kirchhof, P. Machine learning-based identification of risk-factor signatures for undiagnosed atrial fibrillation in primary prevention and post-stroke in clinical practice. *European heart journal. Quality of care & clinical outcomes* **2022**, doi:https://dx.doi.org/10.1093/ehjqcco/qcac013.
  122. Sekelj, S.; Sandler, B.; Johnston, E.; Pollock, K.G.; Hill, N.R.; Gordon, J.; Tsang, C.; Khan, S.; Ng, F.S.; Farooqui, U. Detecting undiagnosed atrial fibrillation in UK primary care: Validation of a machine learning prediction algorithm in a retrospective cohort study. *EUROPEAN JOURNAL OF PREVENTIVE CARDIOLOGY* **2021**, 28, 598-605, doi:10.1177/2047487320942338.
  123. Shan, S.M.; Tang, S.C.; Huang, P.W.; Lin, Y.M.; Huang, W.H.; Lai, D.M.; Wu, A.Y.; Ieee. Reliable PPG-based Algorithm in Atrial Fibrillation Detection. In Proceedings of the PROCEEDINGS OF 2016 IEEE BIOMEDICAL CIRCUITS AND SYSTEMS CONFERENCE (BIOCAS), 2016; pp. 340-343.
  124. Tiwari, P.; Colborn, K.L.; Smith, D.E.; Xing, F.; Ghosh, D.; Rosenberg, M.A. Assessment of a Machine Learning Model Applied to Harmonized Electronic Health Record Data for the Prediction of Incident Atrial Fibrillation. *JAMA network open* **2020**, 3, e1919396, doi:https://dx.doi.org/10.1001/jamanetworkopen.2019.19396.
  125. Abdul-Kadir, N.A.; Mat Safri, N.; Othman, M.A. Dynamic ECG features for atrial fibrillation recognition. *Computer Methods and Programs in Biomedicine* **2016**, 136, 143-150, doi:https://dx.doi.org/10.1016/j.cmpb.2016.08.021.
  126. Bahrami Rad, A.; Galloway, C.; Treiman, D.; Xue, J.; Li, Q.; Sameni, R.; Albert, D.; Clifford, G.D. Atrial fibrillation detection in outpatient electrocardiogram monitoring: An algorithmic crowdsourcing approach. *PloS one* **2021**, 16, e0259916, doi:https://dx.doi.org/10.1371/journal.pone.0259916.
  127. Ben Itzhak, S.; Ricon, S.S.; Biton, S.; Behar, J.A.; Sobel, J.A. Effect of temporal resolution on the detection of cardiac arrhythmias using HRV features and machine learning. *PHYSIOLOGICAL MEASUREMENT* **2022**, 43, doi:10.1088/1361-6579/ac6561.
  128. Chanthercrob, J.; Mahattanatawee, S.; Teeramongkonrasmee, A.; Somboon, P.; Ieee. Development of Rhythm-based and Morphology-based Algorithm for Atrial Fibrillation Detection From Single Lead ECG Signal. In Proceedings of the 2020 8TH INTERNATIONAL ELECTRICAL ENGINEERING CONGRESS (IEECON), 2020.
  129. Couceiro, R.; Henriques, J.; Paiva, R.P.; Antunes, M.; Carvalho, P. Physiologically motivated detection of Atrial Fibrillation. *Annual International Conference of the IEEE Engineering in Medicine and Biology Society. IEEE Engineering in Medicine and Biology*

- Society. Annual International Conference* **2017**, 2017, 1278-1281, doi:<https://dx.doi.org/10.1109/EMBC.2017.8037065>.
130. Duverney, D.; Gaspoz, J.M.; Pichot, V.; Roche, F.; Brion, R.; Antoniadis, A.; Barthelemy, J.C. High accuracy of automatic detection of atrial fibrillation using wavelet transform of heart rate intervals. *PACE-PACING AND CLINICAL ELECTROPHYSIOLOGY* **2002**, 25, 457-462, doi:10.1046/j.1460-9592.2002.00457.x.
  131. Eerikainen, L.M.; Bonomi, A.G.; Schipper, F.; Dekker, L.R.C.; de Morree, H.M.; Vullings, R.; Aarts, R.M. Detecting Atrial Fibrillation and Atrial Flutter in Daily Life Using Photoplethysmography Data. *IEEE JOURNAL OF BIOMEDICAL AND HEALTH INFORMATICS* **2020**, 24, 1610-1618, doi:10.1109/JBHI.2019.2950574.
  132. Fan, X.; Yao, Q.; Cai, Y.; Miao, F.; Sun, F.; Li, Y. Multiscaled Fusion of Deep Convolutional Neural Networks for Screening Atrial Fibrillation from Single Lead Short ECG Recordings. *IEEE Journal of Biomedical and Health Informatics* **2018**, 22, 1744-1753, doi:<https://dx.doi.org/10.1109/JBHI.2018.2858789>.
  133. Faust, O.; Acharya, U.R. Automated classification of five arrhythmias and normal sinus rhythm based on RR interval signals. *EXPERT SYSTEMS WITH APPLICATIONS* **2021**, 181, doi:10.1016/j.eswa.2021.115031.
  134. Helfenbein, E.; Gregg, R.; Lindauer, J.; Zhou, S. An Automated Algorithm for the Detection of Atrial Fibrillation in the Presence of Paced Rhythms. In *Proceedings of the COMPUTING IN CARDIOLOGY 2010, VOL 37, 2010*; pp. 113-116.
  135. Ivanovic, M.D.; Atanasoski, V.; Shvilkin, A.; Hadzievski, L.; Maluckov, A. Deep Learning Approach for Highly Specific Atrial Fibrillation and Flutter Detection based on RR Intervals. *Annual International Conference of the IEEE Engineering in Medicine and Biology Society. IEEE Engineering in Medicine and Biology Society. Annual International Conference* **2019**, 2019, 1780-1783, doi:<https://dx.doi.org/10.1109/EMBC.2019.8856806>.
  136. Jia, Z.G.; Shi, Y.Y.; Saba, S.; Hu, J.T. On-device Prior Knowledge Incorporated Learning for Personalized Atrial Fibrillation Detection. *ACM TRANSACTIONS ON EMBEDDED COMPUTING SYSTEMS* **2021**, 20, doi:10.1145/3476987.
  137. Kennedy, A.; Finlay, D.D.; Guldenring, D.; Bond, R.R.; Moran, K.; McLaughlin, J. Automated detection of atrial fibrillation using R-R intervals and multivariate-based classification. *JOURNAL OF ELECTROCARDIOLOGY* **2016**, 49, 871-876, doi:10.1016/j.jelectrocard.2016.07.033.
  138. Kim, J.Y.; Kim, K.G.; Tae, Y.; Chang, M.; Park, S.-J.; Park, K.-M.; On, Y.K.; Kim, J.S.; Lee, Y.; Jang, S.-W. An Artificial Intelligence Algorithm With 24 h Holter Monitoring for the Identification of Occult Atrial Fibrillation During Sinus Rhythm. *Frontiers in cardiovascular medicine* **2022**, 9, 906780, doi:<https://dx.doi.org/10.3389/fcvm.2022.906780>.
  139. Krol-Jozaga, B. Atrial fibrillation detection using convolutional neural networks on 2-dimensional representation of ECG signal. *BIOMEDICAL SIGNAL PROCESSING AND CONTROL* **2022**, 74, doi:10.1016/j.bspc.2021.103470.
  140. Lee, H.-C.; Chen, C.-Y.; Lee, S.-J.; Lee, M.-C.; Tsai, C.-Y.; Chen, S.-T.; Li, Y.-J. Exploiting exercise electrocardiography to improve early diagnosis of atrial fibrillation with deep learning neural networks. *Computers in biology and medicine* **2022**, 146, 105584, doi:<https://dx.doi.org/10.1016/j.compbiomed.2022.105584>.
  141. Lee, K.; Choi, H.O.; Min, S.D.; Lee, J.; Guptha, B.B.; Nam, Y. A Comparative Evaluation of Atrial Fibrillation Detection Methods in Koreans Based on Optical

- Recordings Using a Smartphone. *IEEE ACCESS* **2017**, 5, 11437-11443, doi:10.1109/ACCESS.2017.2700488.
142. Lee, K.; Kim, S.; Choi, H.O.; Lee, J.; Nam, Y. Analyzing electrocardiogram signals obtained from a nymi band to detect atrial fibrillation. *MULTIMEDIA TOOLS AND APPLICATIONS* **2020**, 79, 15985-15999, doi:10.1007/s11042-018-7075-1.
  143. Lei, N.; Kareem, M.; Moon, S.K.; Ciaccio, E.J.; Acharya, U.R.; Faust, O. Hybrid decision support to monitor atrial fibrillation for stroke prevention. *International Journal of Environmental Research and Public Health* **2021**, 18, 1-19, doi:https://dx.doi.org/10.3390/ijerph18020813.
  144. Leutheuser, H.; Gradl, S.; Eskofier, B.M.; Tobola, A.; Lang, N.; Anneken, L.; Arnold, M.; Achenbach, S.; Ieee. Arrhythmia Classification Using RR Intervals: Improvement With Sinusoidal Regression Feature. In Proceedings of the 2015 IEEE 12TH INTERNATIONAL CONFERENCE ON WEARABLE AND IMPLANTABLE BODY SENSOR NETWORKS (BSN), 2015.
  145. Liaqat, S.; Dashtipour, K.; Zahid, A.; Assaleh, K.; Arshad, K.; Ramzan, N. Detection of Atrial Fibrillation Using a Machine Learning Approach. *INFORMATION* **2020**, 11, doi:10.3390/info11120549.
  146. Liu, X.; Yang, X.; Wang, D.; Wong, A.; Ma, L.; Li, L. VidAF: A Motion-Robust Model for Atrial Fibrillation Screening From Facial Videos. *IEEE Journal of Biomedical and Health Informatics* **2022**, 26, 1672-1683, doi:https://dx.doi.org/10.1109/JBHI.2021.3124967.
  147. Medic, G.; Kotsopoulos, N.; Connolly, M.P.; Lavelle, J.; Norlock, V.; Wadhwa, M.; Mohr, B.A.; Derkac, W.M. Mobile Cardiac Outpatient Telemetry Patch vs. Implantable Loop Recorder in Cryptogenic Stroke Patients in the US - Cost-Minimization Model. *Medical devices (Auckland, N.Z.)* **2021**, 14, 445-458, doi:https://dx.doi.org/10.2147/MDER.S337142.
  148. Mittal, S.; Oliveros, S.; Li, J.; Barroyer, T.; Henry, C.; Gardella, C. AI Filter Improves Positive Predictive Value of Atrial Fibrillation Detection by an Implantable Loop Recorder. *JACC: Clinical Electrophysiology* **2021**, 7, 965-975, doi:https://dx.doi.org/10.1016/j.jacep.2020.12.006.
  149. Mousavi, S.; Afghah, F.; Acharya, U.R. HAN-ECG: An interpretable atrial fibrillation detection model using hierarchical attention networks. *COMPUTERS IN BIOLOGY AND MEDICINE* **2020**, 127, doi:10.1016/j.combiomed.2020.104057.
  150. Nguyen, Q.H.; Do, T.T.T.; Thoppan, A.; Chong, C.F.; Arya, I.; Maddi, K.M.; Pandey, S.; Balakrishnan, V.K.; Pham, H.N.; Nguyen, B.P.; et al. Effective Arrhythmia Detection using Majority Voting. In Proceedings of the PROCEEDINGS OF 2019 INTERNATIONAL CONFERENCE ON SYSTEM SCIENCE AND ENGINEERING (ICSSE), 2019; pp. 109-114.
  151. Nuryani, N.; Harjito, B.; Yahya, I.; Lestari, A.; Ieee. Atrial Fibrillation Detection Using Support Vector Machine. In Proceedings of the PROCEEDING JOINT INTERNATIONAL CONFERENCE ON ELECTRIC VEHICULAR TECHNOLOGY AND INDUSTRIAL, MECHANICAL, ELECTRICAL, AND CHEMICAL ENGINEERING (ICEVT & IMECE), 2015; pp. 215-218.
  152. Park, J.; Lee, S.; Jeon, M. Atrial fibrillation detection by heart rate variability in Poincare plot. *BIOMEDICAL ENGINEERING ONLINE* **2009**, 8, doi:10.1186/1475-925X-8-38.

153. Pereira, T.; Ding, C.; Gadhoumi, K.; Tran, N.; Colorado, R.A.; Meisel, K.; Hu, X. Deep learning approaches for plethysmography signal quality assessment in the presence of atrial fibrillation. *PHYSIOLOGICAL MEASUREMENT* **2019**, *40*, doi:10.1088/1361-6579/ab5b84.
154. Pham, T.H.; Sree, V.; Mapes, J.; Dua, S.; Lih, O.S.; Koh, J.E.W.; Ciaccio, E.J.; Acharya, U.R. A novel machine learning framework for automated detection of arrhythmias in ECG segments. *JOURNAL OF AMBIENT INTELLIGENCE AND HUMANIZED COMPUTING* **2021**, *12*, 10145-10162, doi:10.1007/s12652-020-02779-1.
155. Piccini, J.P.; Stanelle, E.; Hylek, E.M.; Johnson, L.C.; Kanwar, R.; Lakkireddy, D.R.; Mittal, S.; Peacock, J.; Russo, A.M.; Soderlund, D.; et al. B-PO02-079 PERFORMANCE OF ATRIAL FIBRILLATION BURDEN PATTERNS DETECTED VIA INSERTABLE CARDIAC MONITOR FOR STROKE RISK STRATIFICATION. *Heart Rhythm* **2021**, *18*, S128, doi:https://dx.doi.org/10.1016/j.hrthm.2021.06.334.
156. Piorkowski, C.; Manyam, H.; Lakkireddy, D.; Byazrova, E.; Pavia, S.; Afzal, M.; John, J.; Qu, F.; Dawoud, F.; Davis, K.; et al. Effectiveness and performance of confirm RxTM SharpSenseTM technology: A multi-center retrospective analysis. *Journal of Arrhythmia* **2019**, *35*, 429-430, doi:https://dx.doi.org/10.1002/joa3.12273.
157. Pokaprakarn, T.; Kitzmiller, R.R.; Moorman, J.R.; Lake, D.E.; Krishnamurthy, A.K.; Kosorok, M.R. Sequence to Sequence ECG Cardiac Rhythm Classification Using Convolutional Recurrent Neural Networks. *IEEE JOURNAL OF BIOMEDICAL AND HEALTH INFORMATICS* **2022**, *26*, 572-580, doi:10.1109/JBHI.2021.3098662.
158. Pollock, K.G.; Sekelj, S.; Johnston, E.; Sandler, B.; Hill, N.R.; Ng, F.S.; Khan, S.; Nassar, A.; Farooqui, U. Application of a machine learning algorithm for detection of atrial fibrillation in secondary care. *International journal of cardiology. Heart & vasculature* **2020**, *31*, 100674, doi:https://dx.doi.org/10.1016/j.ijcha.2020.100674.
159. Qayyum, A.; Meriaudeau, F.; Chan, G.C.Y.; Ieee. Classification of Atrial Fibrillation with Pre-Trained Convolutional Neural Network Models. In Proceedings of the 2018 IEEE-EMBS CONFERENCE ON BIOMEDICAL ENGINEERING AND SCIENCES (IECBES), 2018; pp. 594-599.
160. Quartieri, F.; Cauti, F.M.; Calo, L.; Vicentini, A.; Huemer, M.; Ebrahim, I.; Kim, G.; Hutson, C.S.; Qu, F.; Dawoud, F.; et al. Retrospective analysis of confirm RxTM SharpSenseTM technology using real-world data from the SMART registry. *Journal of Arrhythmia* **2019**, *35*, 20, doi:https://dx.doi.org/10.1002/joa3.12266.
161. Rahul, J.; Sharma, L.D. Artificial intelligence-based approach for atrial fibrillation detection using normalised and short-duration time-frequency ECG. *BIOMEDICAL SIGNAL PROCESSING AND CONTROL* **2022**, *71*, doi:10.1016/j.bspc.2021.103270.
162. Rosa, G.; Laudato, G.; Colavita, A.R.; Scalabrino, S.; Oliveto, R. Automatic Real-time Beat-to-beat Detection of Arrhythmia Conditions. In Proceedings of the HEALTHINF: PROCEEDINGS OF THE 14TH INTERNATIONAL JOINT CONFERENCE ON BIOMEDICAL ENGINEERING SYSTEMS AND TECHNOLOGIES - VOL. 5: HEALTHINF, 2021; pp. 212-222.
163. Sahu, I.; Ukil, A.; Khandelwal, S.; Pal, A. LTH-ECG: Lottery Ticket Hypothesis-based Deep Learning Model Compression for Atrial Fibrillation Detection from Single Lead ECG On Wearable and Implantable Devices. *Annual International Conference of the IEEE Engineering in Medicine and Biology Society. IEEE Engineering in Medicine and Biology Society. Annual International Conference* **2022**, 2022, 1655-1658, doi:https://dx.doi.org/10.1109/EMBC48229.2022.9871259.

164. Sandberg, E.L.; Grenne, B.L.; Berge, T.; Grimsmo, J.; Atar, D.; Halvorsen, S.; Fensli, R.; Jortveit, J. Diagnostic Accuracy and Usability of the ECG247 Smart Heart Sensor Compared to Conventional Holter Technology. *Journal of Healthcare Engineering* **2021**, *2021*, 5230947, doi:https://dx.doi.org/10.1155/2021/5230947.
165. Sasaki, K.; Mieda, R.; Hamada, S.; Hirao, K.; Sasano, T. Detection of atrial fibrillation using a deep learning with wearable pulse wave sensor. *Journal of Arrhythmia* **2019**, *35*, 163, doi:https://dx.doi.org/10.1002/joa3.12267.
166. Schack, T.; Safi Harb, Y.; Muma, M.; Zoubir, A.M. Computationally efficient algorithm for photoplethysmography-based atrial fibrillation detection using smartphones. *Annual International Conference of the IEEE Engineering in Medicine and Biology Society. IEEE Engineering in Medicine and Biology Society. Annual International Conference* **2017**, *2017*, 104-108, doi:https://dx.doi.org/10.1109/EMBC.2017.8036773.
167. Sideswar, J.B.; Krishan, T.S.; Nagarajan, V.; Shanthakumar, S.; Vijayaraghavan, V. End-to-End Optimized Arrhythmia Detection Pipeline using Machine Learning for Ultra-Edge Devices. In Proceedings of the 20TH IEEE INTERNATIONAL CONFERENCE ON MACHINE LEARNING AND APPLICATIONS (ICMLA 2021), 2021; pp. 1501-1506.
168. Sims, H.; Clatworthy, P. Atrial fibrillation in stroke: Is using an ascod aetiological classification feasible in clinical practice? *European Stroke Journal* **2021**, *6*, 415, doi:https://dx.doi.org/10.1177/239698732111034932.
169. Sun, Y.; Yang, Y.Y.; Wu, B.J.; Huang, P.W.; Cheng, S.E.; Wu, B.F.; Chen, C.C. Contactless facial video recording with deep learning models for the detection of atrial fibrillation. *SCIENTIFIC REPORTS* **2022**, *12*, doi:10.1038/s41598-021-03453-y.
170. Tadi, M.J.; Mehrang, S.; Kaisti, M.; Lahdenoja, O.; Hurnanen, T.; Jaakkola, J.; Jaakkola, S.; Vasankari, T.; Kiviniemi, T.; Airaksinen, J.; et al. Comprehensive Analysis of Cardiogenic Vibrations for Automated Detection of Atrial Fibrillation Using Smartphone Mechanocardiograms. *IEEE SENSORS JOURNAL* **2019**, *19*, 2230-2242, doi:10.1109/JSEN.2018.2882874.
171. Taniguchi, H.; Takata, T.; Takechi, M.; Furukawa, A.; Iwasawa, J.; Kawamura, A.; Taniguchi, T.; Tamura, Y. Explainable Artificial Intelligence Model for Diagnosis of Atrial Fibrillation Using Holter Electrocardiogram Waveforms. *INTERNATIONAL HEART JOURNAL* **2021**, *62*, 534-539, doi:10.1536/ihj.21-094.
172. Tison, G.H.; Sanchez, J.M.; Ballinger, B.; Singh, A.; Olgin, J.E.; Pletcher, M.J.; Vittinghoff, E.; Lee, E.S.; Fan, S.M.; Gladstone, R.A.; et al. Passive Detection of Atrial Fibrillation Using a Commercially Available Smartwatch. *JAMA CARDIOLOGY* **2018**, *3*, 409-416, doi:10.1001/jamacardio.2018.0136.
173. Ukil, A.; Marin, L.; Mukhopadhyay, S.C.; Jara, A.J. AFSense-ECG: Atrial Fibrillation Condition Sensing From Single Lead Electrocardiogram (ECG) Signals. *IEEE SENSORS JOURNAL* **2022**, *22*, 12269-12277, doi:10.1109/JSEN.2022.3162691.
174. Wong, C.K.; Hai, J.J.; Lau, Y.-M.; Zhou, M.; Lui, H.-W.; Lau, K.K.; Chan, K.-H.; Mok, T.M.; Liu, Y.; Feng, Y.; et al. Protocol for Home-Based Solution for Remote Atrial Fibrillation Screening to Prevent Recurrence Stroke (HUA-TUO AF Trial): a randomised controlled trial. *BMJ open* **2022**, *12*, e053466, doi:https://dx.doi.org/10.1136/bmjopen-2021-053466.
175. Xia, Y.; Wulan, N.; Wang, K.; Zhang, H. Detecting atrial fibrillation by deep convolutional neural networks. *Computers in Biology and Medicine* **2018**, *93*, 84-92, doi:https://dx.doi.org/10.1016/j.compbiomed.2017.12.007.



176. Yao, Z.J.; Zhu, Z.Y.; Chen, Y.X.; Ieee. Atrial Fibrillation Detection by Multi-scale Convolutional Neural Networks. In Proceedings of the 2017 20TH INTERNATIONAL CONFERENCE ON INFORMATION FUSION (FUSION), 2017; pp. 1159-1164.
177. Yokokawa, M.; Ip, R.; Sheikh, A.; Castellani, M.; Ip, J. ACCURACY OF IMPLANTABLE CARDIAC MONITOR IN DIAGNOSING CARDIAC ARRHYTHMIAS: A PROSPECTIVE RANDOMIZED CLINICAL TRIAL COMPARING REVEAL LINQ TRURHYTHMTM VERSUS CONFIRM RX SHARPSENSETM. *Journal of the American College of Cardiology* **2020**, *75*, 440, doi:<https://dx.doi.org/10.1016/S0735-1097%2820%2931067-6>.
178. Yu, Y.; Wang, D. Detected Method of Paroxysmal Atrial Fibrillation Based on Mixed Expert Model. *Basic and Clinical Pharmacology and Toxicology* **2020**, *127*, 28, doi:<https://dx.doi.org/10.1111/bcpt.13461>.
179. Yue, Z.; Zhu, J.J.; Iop. Atrial Fibrillation Detection Based on EEMD and XGBoost. In Proceedings of the 2019 3RD INTERNATIONAL CONFERENCE ON MACHINE VISION AND INFORMATION TECHNOLOGY (CMVIT 2019), 2019.
180. Zalabarria, U.; Irigoyen, E.; Lowe, A. Diagnosis of atrial fibrillation based on arterial pulse wave foot point detection using artificial neural networks. *COMPUTER METHODS AND PROGRAMS IN BIOMEDICINE* **2020**, *197*, doi:10.1016/j.cmpb.2020.105681.
181. Zhu, L.; Nathan, V.; Kuang, J.; Kim, J.; Avram, R.; Olgin, J.; Gao, J. Atrial Fibrillation Detection and Atrial Fibrillation Burden Estimation via Wearables. *IEEE Journal of Biomedical and Health Informatics* **2022**, *26*, 2063-2074, doi:<https://dx.doi.org/10.1109/JBHI.2021.3131984>.
182. Baturova, M.A.; Sheldon, S.H.; Carlson, J.; Brady, P.A.; Lin, G.; Rabinstein, A.A.; Friedman, P.A.; Platonov, P.G. Electrocardiographic and Echocardiographic predictors of paroxysmal atrial fibrillation detected after ischemic stroke. *BMC Cardiovascular Disorders* **2016**, *16*, 209, doi:10.1186/s12872-016-0384-2.
183. Kallmünzer, B.; Bobinger, T.; Kopp, M.; Kurka, N.; Arnold, M.; Hilz, M.-J.; Schwab, S.; Köhrmann, M. Impact of Heart Rate Dynamics on Mortality in the Early Phase after Ischemic Stroke: A Prospective Observational Trial. *Journal of Stroke and Cerebrovascular Diseases* **2015**, *24*, 946-951, doi:<https://doi.org/10.1016/j.jstrokecerebrovasdis.2014.12.009>.
184. Skrebelyte-Strøm, L.; Rønning, O.M.; Dahl, F.A.; Steine, K.; Kjekshus, H. Prediction of occult atrial fibrillation in patients after cryptogenic stroke and transient ischaemic attack: PROACTIA. *EP Europace* **2022**, euac092, doi:10.1093/europace/euac092.
185. Haeusler, K.G.; Kirchhof, P.; Heuschmann, P.U.; Laufs, U.; Busse, O.; Kunze, C.; Thomalla, G.; Nabavi, D.G.; Röther, J.; Veltkamp, R.; et al. Impact of standardized MONitoring for Detection of Atrial Fibrillation in Ischemic Stroke (MonDAFIS): Rationale and design of a prospective randomized multicenter study. *American Heart Journal* **2016**, *172*, 19-25, doi:<https://doi.org/10.1016/j.ahj.2015.10.010>.
186. Haeusler, K.G.; Kirchhof, P.; Kunze, C.; Tütüncü, S.; Fiessler, C.; Malsch, C.; Olma, M.C.; Jawad-Ul-Qamar, M.; Krämer, M.; Wachter, R.; et al. Systematic monitoring for detection of atrial fibrillation in patients with acute ischaemic stroke (MonDAFIS): a randomised, open-label, multicentre study. *The Lancet Neurology* **2021**, *20*, 426-436, doi:[https://doi.org/10.1016/S1474-4422\(21\)00067-3](https://doi.org/10.1016/S1474-4422(21)00067-3).

187. Poulsen, M.B.; Binici, Z.; Dominguez, H.; Soja, A.M.B.; Kruuse, C.; Hornnes, A.H.; Rasmussen, R.S.; Overgaard, K. Performance of short ECG recordings twice daily to detect paroxysmal atrial fibrillation in stroke and transient ischemic attack patients. *International Journal of Stroke* **2016**, *12*, 192-196, doi:10.1177/1747493016669883.
188. Huang, W.-Y.; Lee, M.; Sung, S.-F.; Tang, S.-C.; Chang, K.-H.; Huang, Y.-S.; Lee, J.-D.; Lee, T.-H.; Jeng, J.-S.; Chung, C.-M.; et al. Atrial fibrillation trial to evaluate real-world procedures for their utility in helping to lower stroke events: A randomized clinical trial. *International Journal of Stroke* **2020**, *16*, 300-310, doi:10.1177/1747493020938297.
189. Glotzer, T.V.; Daoud, E.G.; Wyse, D.G.; Singer, D.E.; Ezekowitz, M.D.; Hilker, C.; Miller, C.; Qi, D.; Ziegler, P.D. The Relationship Between Daily Atrial Tachyarrhythmia Burden From Implantable Device Diagnostics and Stroke Risk. *Circulation: Arrhythmia and Electrophysiology* **2009**, *2*, 474-480, doi:10.1161/CIRCEP.109.849638.
190. Wachter, R.; Gröschel, K.; Gelbrich, G.; Hamann, G.F.; Kermer, P.; Liman, J.; Seegers, J.; Wasser, K.; Schulte, A.; Jürries, F.; et al. Holter-electrocardiogram-monitoring in patients with acute ischaemic stroke (Find-AFRANDOMISED): an open-label randomised controlled trial. *The Lancet Neurology* **2017**, *16*, 282-290, doi:https://doi.org/10.1016/S1474-4422(17)30002-9.
191. Buck, B.H.; Hill, M.D.; Quinn, F.R.; Butcher, K.S.; Menon, B.K.; Gulamhusein, S.; Siddiqui, M.; Coutts, S.B.; Jeerakathil, T.; Smith, E.E.; et al. Effect of Implantable vs. Prolonged External Electrocardiographic Monitoring on Atrial Fibrillation Detection in Patients With Ischemic Stroke: The PER DIEM Randomized Clinical Trial. *JAMA* **2021**, *325*, 2160-2168, doi:10.1001/jama.2021.6128.
192. Brasier, N.; Engelter, S.; Kolbitsch, T.; Tabord, A.; Knobeloch, J.; Kühne, M.; Conen, D.; Traenka, C.; Kreutzberger, T.; Völlmin, G.; et al. The quest for indicators of paroxysmal atrial fibrillation in sinus rhythm – the DETECT AF trial. *Acta Cardiologica* **2019**, *74*, 301-307, doi:10.1080/00015385.2018.1493248.
193. Pereira, T.; Gadhomi, K.; Ma, M.; Liu, X.; Xiao, R.; Colorado, R.A.; Keenan, K.J.; Meisel, K.; Hu, X. A Supervised Approach to Robust Photoplethysmography Quality Assessment. *IEEE Journal of Biomedical and Health Informatics* **2020**, *24*, 649-657, doi:https://dx.doi.org/10.1109/JBHI.2019.2909065.
194. Sung, S.-F.; Sung, K.-L.; Pan, R.-C.; Lee, P.-J.; Hu, Y.-H. Automated risk assessment of newly detected atrial fibrillation poststroke from electronic health record data using machine learning and natural language processing. *Frontiers in cardiovascular medicine* **2022**, *9*, 941237, doi:https://dx.doi.org/10.3389/fcvm.2022.941237.
